# Supplementary material for: Nucleolin-Mediated RNA Localization Regulates Neuron Growth and Cycling Cell Size
Source: PubMed Central journal article supplement — Cell Rep. 2016 Jul 28;16(6):1664–76. doi: 10.1016/j.celrep.2016.07.005 (PMC4978702; doi:10.1016/j.celrep.2016.07.005), 2016-07-28
Supplement: mmc2.pdf [file mmc2.pdf]

## Nucleolin-Mediated RNA Localization Regulates Neuron Growth and Cycling Cell Size

### Graphical Abstract

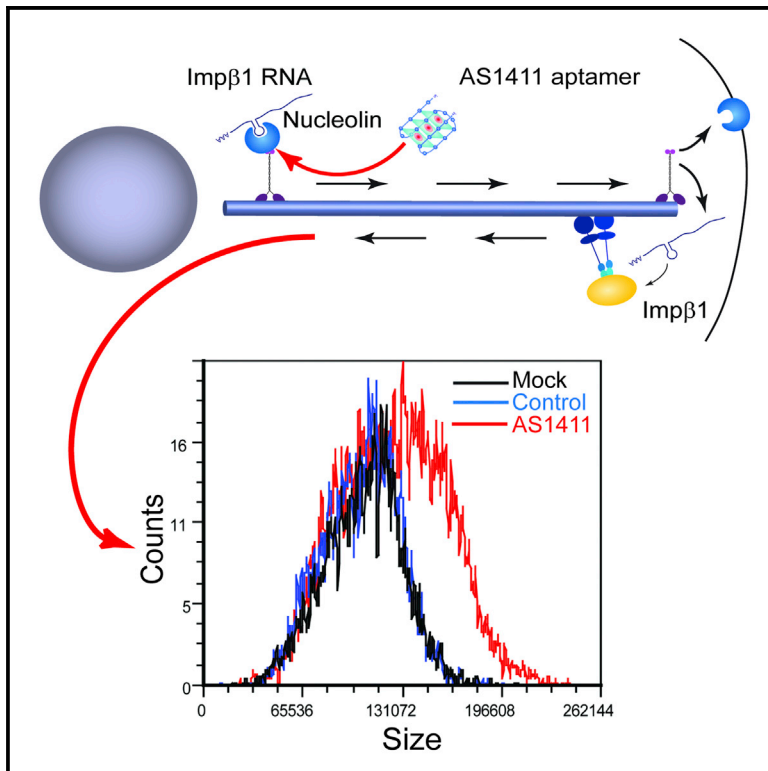

### Authors

Rotem Ben-Tov Perry, Ida Rishal, Ella Doron-Mandel, ..., Alma L. Burlingame, Jeffery L. Twiss, Mike Fainzilber

### Correspondence

mike.fainzilber@weizmann.ac.il

### In Brief

Perry et al. show that motor-dependent mRNA localization regulates neuronal growth and cycling cell size. They implicate the RNA-binding protein nucleolin in importin  $\beta$ 1 mRNA transport to neuronal axons and to the cellular periphery in fibroblasts. Perturbation of this mechanism affects growth and shifts protein synthesis, regulating axon length and cell size.

### Highlights

- A kinesin-nucleolin complex transports size-regulating mRNAs to the cell periphery
- Importin  $\beta$ 1 mRNA MAIL motif associates with nucleolin to regulate growth and size
- Sequestration of nucleolin or importin  $\beta$ 1 enhances growth and shifts protein synthesis
- Subcellular mRNA localization regulates size and growth in neurons and cycling cells

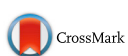

# Nucleolin-Mediated RNA Localization Regulates Neuron Growth and Cycling Cell Size

Rotem Ben-Tov Perry,<sup>1,7</sup> Ida Rishal,<sup>1,7</sup> Ella Doron-Mandel,<sup>1,7</sup> Ashley L. Kalinski,<sup>2</sup> Katalin F. Medzihradzsky,<sup>3</sup> Marco Terenzio,<sup>1</sup> Stefanie Alber,<sup>1</sup> Sandip Koley,<sup>1</sup> Albina Lin,<sup>1</sup> Meir Rozenbaum,<sup>1</sup> Dmitry Yudin,<sup>1</sup> Pabitra K. Sahoo,<sup>2</sup> Cynthia Gomes,<sup>2</sup> Vera Shinder,<sup>4</sup> Wasim Geraisy,<sup>5</sup> Eric A. Huebner,<sup>6</sup> Clifford J. Woolf,<sup>6</sup> Avraham Yaron,<sup>1</sup> Alma L. Burlingame,<sup>3</sup> Jeffery L. Twiss,<sup>2</sup> and Mike Fainzilber<sup>1,\*</sup>

<sup>1</sup>Department of Biomolecular Sciences, Weizmann Institute of Science, Rehovot 76100, Israel

<sup>2</sup>Department of Biological Sciences, University of South Carolina, Columbia, SC 29208, USA

<sup>3</sup>Mass Spectrometry Facility, Department of Pharmaceutical Chemistry, University of California, San Francisco, San Francisco, CA 94158, USA

<sup>4</sup>Department of Chemical Research Support, Weizmann Institute of Science, Rehovot 76100, Israel

<sup>5</sup>Tnuva, Bet Shean 11710, Israel

<sup>6</sup>F.M. Kirby Neurobiology Center, Boston Children's Hospital and Harvard Medical School, Boston, MA 02115, USA

<sup>7</sup>Co-first author

\*Correspondence: [mike.fainzilber@weizmann.ac.il](mailto:mike.fainzilber@weizmann.ac.il)

<http://dx.doi.org/10.1016/j.celrep.2016.07.005>

## SUMMARY

How can cells sense their own size to coordinate biosynthesis and metabolism with their growth needs? We recently proposed a motor-dependent bidirectional transport mechanism for axon length and cell size sensing, but the nature of the motor-transported size signals remained elusive. Here, we show that motor-dependent mRNA localization regulates neuronal growth and cycling cell size. We found that the RNA-binding protein nucleolin is associated with importin  $\beta$ 1 mRNA in axons. Perturbation of nucleolin association with kinesins reduces its levels in axons, with a concomitant reduction in axonal importin  $\beta$ 1 mRNA and protein levels. Strikingly, subcellular sequestration of nucleolin or importin  $\beta$ 1 enhances axonal growth and causes a subcellular shift in protein synthesis. Similar findings were obtained in fibroblasts. Thus, subcellular mRNA localization regulates size and growth in both neurons and cycling cells.

## INTRODUCTION

Cell size homeostasis is one of the most fundamental aspects of biology, with distinct size ranges for individual cell types (Ginzberg et al., 2015). Growing cells must match transcriptional and translational output to their size change needs, but the mechanisms underlying such coordination are largely unknown (Marguerat and Bähler, 2012). Neurons exhibit the greatest size differences of any class of cells, having process lengths ranging from a few microns in central interneurons to meters in large mammals. Embryonic neuron growth rates vary according to the distances they must travel at different stages of elongating growth in the embryo (Lallemend et al., 2012). Moreover, axonal

lengths impose a significant delay between transcription and biosynthesis in the cell body and delivery of the components necessary for growth and maintenance to the axon. How then can large cells such as neurons coordinate between their transcriptional and metabolic output to the growth and maintenance needs of differently sized axonal arbors?

Most studies of neuronal growth have focused on extrinsic influences, such as neurotrophic factors secreted by adjacent or target cells (Harrington and Ginty, 2013). Intrinsic regulation of neuronal growth has been reported in different neuronal subtypes (Albus et al., 2013), but the underlying mechanisms are largely unknown. The large dimensions of a growing neuron require active transport by molecular motors for transfer of signals between neurites and cell body. In previous work, we examined the possibility that molecular motor-based signaling might allow distance sensing between cell center and axon endings on a continuous basis, enabling regulation of axon growth rates. Computational modeling directed our attention to a bilateral mechanism with regulatory feedback (Rishal et al., 2012).

In this model, a cell body signal is anterogradely transported by kinesin motors to the neurite end, where it activates dynein-mediated retrograde transport of another cargo to the cell center. The retrograde signal then represses the original anterograde entity, thus periodically resetting the system and generating an oscillating retrograde signal, with frequencies that decrease as a function of increasing cell length. Simulations show that reductions in anterograde or retrograde signals in this model cause a slowing in the rate of frequency decrease with time in the system. If growth rates are correlated with retrograde signal frequency, this leads to the counter-intuitive prediction that reducing either anterograde or retrograde signals should lead to increased axon lengths in both cases. We confirmed this prediction for specific kinesins and for dynein heavy chain 1 in adult sensory neurons and in mouse embryonic fibroblasts (Rishal et al., 2012), demonstrating a role for microtubule-bound motors in cell size sensing and growth control. However, the nature of the motor-transported size signals remained unknown.

Here we identify RNA localization and localized protein translation as critical aspects of motor-dependent size sensing. We show that depletion of the nuclear import factor importin  $\beta$ 1 from axons by a 3' UTR knockout (KO) or by sequestration of nucleolin, an RNA-binding protein (RBP) involved in importin  $\beta$ 1 axonal localization, enhances neuronal outgrowth, concomitantly with a subcellular shift in protein synthesis. Similar perturbations affect the morphology and size of fibroblasts in culture. Thus, the subcellular localization of nucleolin-associated mRNAs regulates cell size and growth control mechanisms.

## RESULTS

### Increased Axonal Growth Rates in Sensory Neurons Lacking Axonal Importin $\beta$ 1

To identify participants in motor-dependent cell length sensing, we screened a number of mouse mutants for increased axonal outgrowth of adult sensory neurons in culture. We crossed candidate mouse lines to Thy1/yellow fluorescent protein (YFP) mice (Feng et al., 2000) to allow live imaging of growing neurons. Calculation of ongoing growth rates from such experiments confirmed previous observations (Rishal et al., 2012) that the *Loa* point mutation in dynein heavy chain 1 (*Dync1h1*) induces a significantly higher axonal growth rate in heterozygous sensory neurons (Figures S1A and S1B). A similar result was observed for sensory neuron cultures from a mouse with a 3' UTR deletion in importin  $\beta$ 1. The importin  $\beta$ 1 3' UTR<sup>-/-</sup> mouse revealed subcellular depletion of importin  $\beta$ 1 protein from sensory axons with no change in neuronal cell bodies (Perry et al., 2012). Strikingly, YFP-labeled importin  $\beta$ 1 3' UTR<sup>-/-</sup> neurons revealed significantly higher axon growth rates than neurons from wild-type (WT) littermates (Figures 1A and 1B). Moreover, quantification of axon lengths in vivo during the normal elongating phase of development revealed ~35% more axon growth in the mutants than in WT littermates at embryonic day (E11.5) (Figures 1C and 1D). We further confirmed specific axonal reduction of importin  $\beta$ 1 in growing sensory axons from adult KO mice (Figures 1E–1G). These findings suggest that the subcellular localization of importin  $\beta$ 1 plays a role in setting neuronal growth rates both in vitro and in vivo.

Previous work had demonstrated local translation of importin  $\beta$ 1 in sensory axons upon nerve injury (Hanz et al., 2003; Yudin et al., 2008). To test whether importin  $\beta$ 1 also might be locally translated in the axons of actively growing neurons, we took advantage of the RiboTag transgenic mouse model (Sanz et al., 2009) to examine endogenous mRNA interaction with ribosomes. We crossed RiboTag and *Islet1-Cre* mice to generate HA-tagged ribosomes in sensory neurons, and we verified neuron-specific expression of the HA tag in dorsal root ganglia (DRG) cultures (Figure S1C). HA-tagged ribosomes were present in axons and axon tips of growing sensory neurons (Figures 1H and S1C). Axon and cell body extracts from compartmentalized cultures were subjected to HA immunoprecipitation followed by qPCR for ribosome-associated RNAs. Ribosome immunoprecipitation was confirmed by qPCR for 18S RNA (Figure 1I). Importin  $\beta$ 1 mRNA was found to be associated with ribosomes in both cell body and axonal compartments (Figure 1I), supporting its local translation in growing axons.

Locally translated importin  $\beta$ 1 is retrogradely transported from axon to soma by dynein in injured sensory neurons (Hanz et al., 2003; Perry et al., 2012). To determine whether importin  $\beta$ 1 also is associated with dynein in growing axons, we used in situ proximity ligation assay (PLA) (Söderberg et al., 2006) for direct visualization of the association of endogenous proteins within growing axons. Robust colocalization of importin  $\beta$ 1 and dynein was observed in growing axons (Figure 1J), with little or no background in single-antibody controls (Figure S1D). Association of importin  $\beta$ 1 and dynein also was confirmed by co-immunoprecipitation from axoplasm (Figure 1K). The influence of dynein depletion on the subcellular distribution of importin  $\beta$ 1 was further assessed by capillary electrophoresis immuno-quantification (Harris, 2015), showing reduced axonal and increased soma importin  $\beta$ 1 in *Loa* dynein mutant neurons (Figure S1E). The small interfering RNA (siRNA)-mediated knockdowns of *Kif5A* and *Kif5B* had a similar effect on importin  $\beta$ 1 mRNA levels in axons versus soma of compartmentalized neuron cultures (data not shown). In this context, it is noteworthy that siRNA knockdown of these two kinesins previously was shown to induce axon lengthening in sensory neuron cultures (Rishal et al., 2012).

### Delineation of an Axon-Localizing Stem-Loop Motif in Importin $\beta$ 1 3' UTR

Taken together, the above data show that importin  $\beta$ 1 is present in growing axons as mRNA in association with ribosomes and as protein in association with dynein and that its subcellular removal from axons enhances their growth. We therefore set out to identify the molecular determinants of axonal localization of importin  $\beta$ 1 mRNA. We used Mfold (Zucker, 2003) to predict secondary structures between 793 and 1,148 nt of the importin  $\beta$ 1 3' UTR, which we previously had shown harbors the axon-localizing element (Perry et al., 2012). Based on these predictions, we then generated a series of deletion mutants within this region as shown in Figure 2A, and we tested their capacity to localize a destabilized GFP reporter construct upon transfection of sensory neurons. Fluorescence recovery after photobleaching (FRAP) experiments with these constructs showed a loss of axon-localizing activity upon deletion of the motif between 916 and 994 nt in the 3' UTR (Figures 2B–2D, S2A, and S2B).

Secondary structure analyses for this region and adjacent segments identified a predicted stem-loop motif of 34 nt spanning positions 991–1,024 (Figure 2B). This motif is hereby designated as motif for axonal importin localization (MAIL). Fluorescence in situ hybridization (FISH) showed that deletion of MAIL removed axonal localization capacity of the importin  $\beta$ 1 3' UTR, while fusion of two MAIL sequences to the short 1–134 non-localizing variant of importin  $\beta$ 1 3' UTR (Perry et al., 2012) conveyed axon-localizing capacity (Figures 2E and S2C). U-G mutations in the loop region of MAIL were used to generate a mutant termed GMAIL (Figure 2B) that revealed reduced axon-localizing activity (Figures S2D and S2E). A combination of the GMAIL mutations with additional mutations in the stem region generated a stem-and-loop mutant completely devoid of localizing activity termed inactive MAIL (IMAIL; Figure 2B). FISH and FRAP assays with reporter

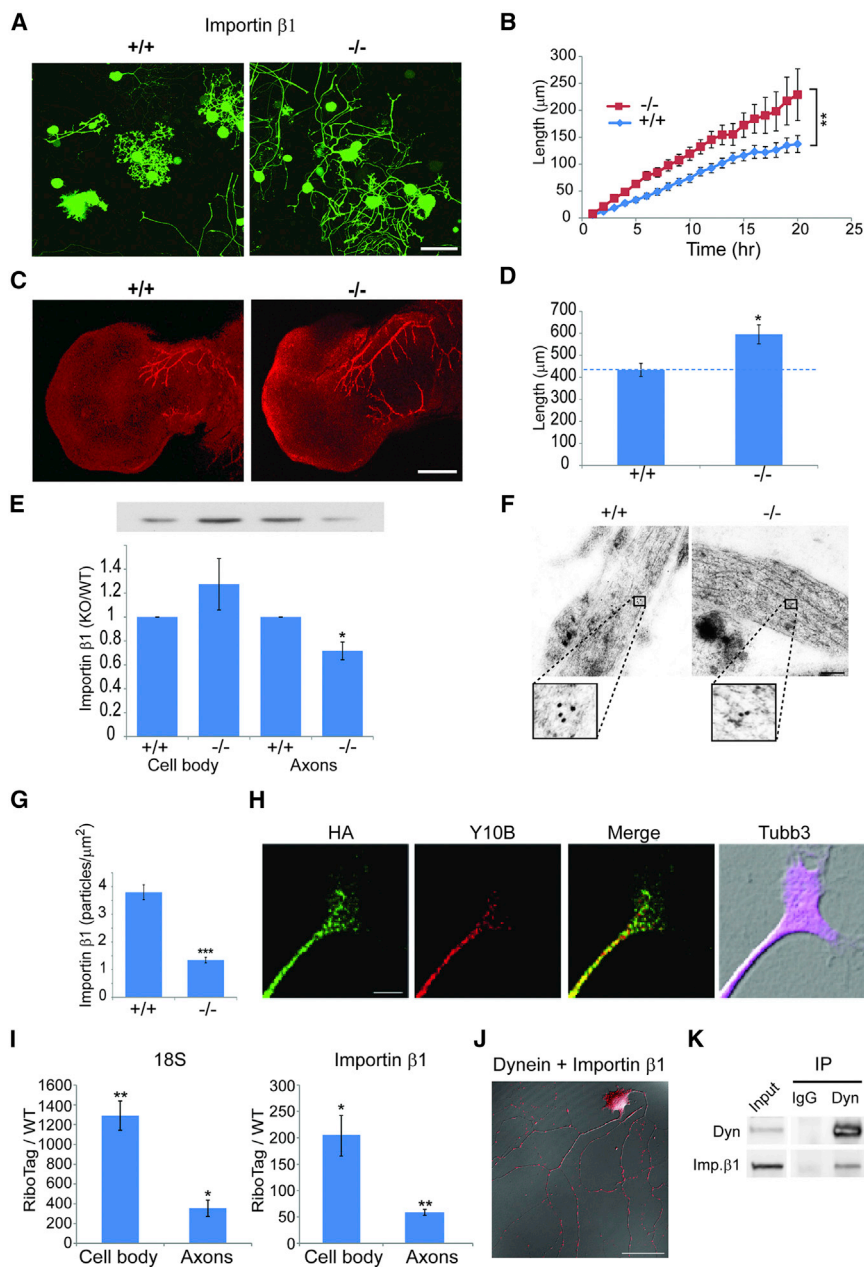

**Figure 1. Increased Axonal Growth Rates in Importin  $\beta$ 1 Mutant Sensory Neurons**

(A) Fluorescent images show cultured YFP-expressing DRG neurons from WT versus importin  $\beta$ 1 3' UTR-null mice at 48 hr in vitro. Scale bar, 100  $\mu$ m.

(B) Quantification of time-lapse imaging of YFP-expressing DRG neurons in culture. Images were taken every hour in a Fluoview FV10i incubator microscope. 3  $\times$  3 montages of neighboring acquisition sites were analyzed using ImageJ. Longest neurite growth rates in these experiments were 6.9  $\pm$  0.6  $\mu$ m/hr for WT versus 11.5  $\pm$  0.9  $\mu$ m/hr for importin  $\beta$ 1 3' UTR<sup>-/-</sup> mice. Mean  $\pm$  SEM; n  $\geq$  30 cells per experimental group; \*p < 0.05 for comparison of growth rates, one-way ANOVA.

(C) Whole-mount neurofilament staining in E11.5 limbs in WT and importin  $\beta$ 1 3' UTR<sup>-/-</sup> mice is shown. Scale bar, 200  $\mu$ m.

(D) Quantification reveals significantly longer total neurite lengths at E11.5 in importin  $\beta$ 1 3' UTR<sup>-/-</sup> embryos than in WT littermates (n  $\geq$  7; \*p < 0.05, Student's t test).

(E) Western blot quantifications for importin  $\beta$ 1 in axon versus cell body compartments of sensory neurons cultured for 48 hr in compartmentalized Boyden chambers. A representative blot with the same loading order is shown above the graph. WT versus importin  $\beta$ 1 3' UTR<sup>-/-</sup> neurons are shown. Mean  $\pm$  SEM; n = 3; \*p < 0.05, Student's t test.

(F) Electron micrographs show immunogold labeling for importin  $\beta$ 1 on ultrathin monolayer sections of cultured DRG neurons from WT and importin  $\beta$ 1 3' UTR<sup>-/-</sup> mice. Scale bar, 200 nm; gold particle diameter, 10 nm.

(G) Quantification of immunogold labeling confirms reduced levels of importin  $\beta$ 1 protein in growing sensory axons of importin  $\beta$ 1 3' UTR<sup>-/-</sup> mice. Mean  $\pm$  SEM; n  $\geq$  50; \*\*\*p < 0.001, Student's t test.

(H) DRG neuron cultures from Islet-Cre RiboTag mice were immunostained for the tagged ribosome epitope (HA), ribosomal RNA (Y10B), and axonal tubulin (Tubb3). A representative axon tip is shown. Scale bar, 5  $\mu$ m. For additional images see Figure S1C.

(I) Quantification of ribosomal 18S RNA (left) and importin  $\beta$ 1 mRNA (right) in HA-RiboTag pull-downs from axonal and cell body compartments from Islet-Cre RiboTag DRG neurons cultured for 96 hr in compartmentalized Boyden chambers.

RNA levels are quantified as fold change of levels in control pull-downs from WT cultures. Mean  $\pm$  SEM; n = 4; \*p < 0.05 and \*\*p < 0.005, Student's t test.

(J) Representative PLA images to identify importin  $\beta$ 1-dynein complexes in DRG neurons grown for 48 hr in culture. After 48 hr the neurons were fixed and stained for dynein and importin  $\beta$ 1, followed by the PLA probes. Scale bar, 50  $\mu$ m. See also Figures S1D and S1E.

(K) Co-immunoprecipitation (colP) of importin  $\beta$ 1 with dynein from axoplasm. Immunoprecipitations were carried out with dynein IC74.1 intermediate-chain antibody versus non-immunized mouse IgG.

See also Figure S1.

constructs comparing MAIL with these mutated motifs confirmed specific MAIL-dependent axon localization in sensory neurons (Figures 2E, S2D, and S2E). Comparisons of importin  $\beta$ 1 sequence from a diversity of mammalian species revealed high conservation of the MAIL motif, especially in the loop region (Figure S2F).

### Identification of Nucleolin as a Binding Protein for the Importin $\beta$ 1 3' UTR MAIL Motif

We then sought to identify RBPs that interact with the MAIL motif. Pull-downs of bovine sciatic nerve axoplasm with biotinylated RNA motifs revealed clear differences in the interacting protein profile between MAIL and Gmail (Figures 3A,



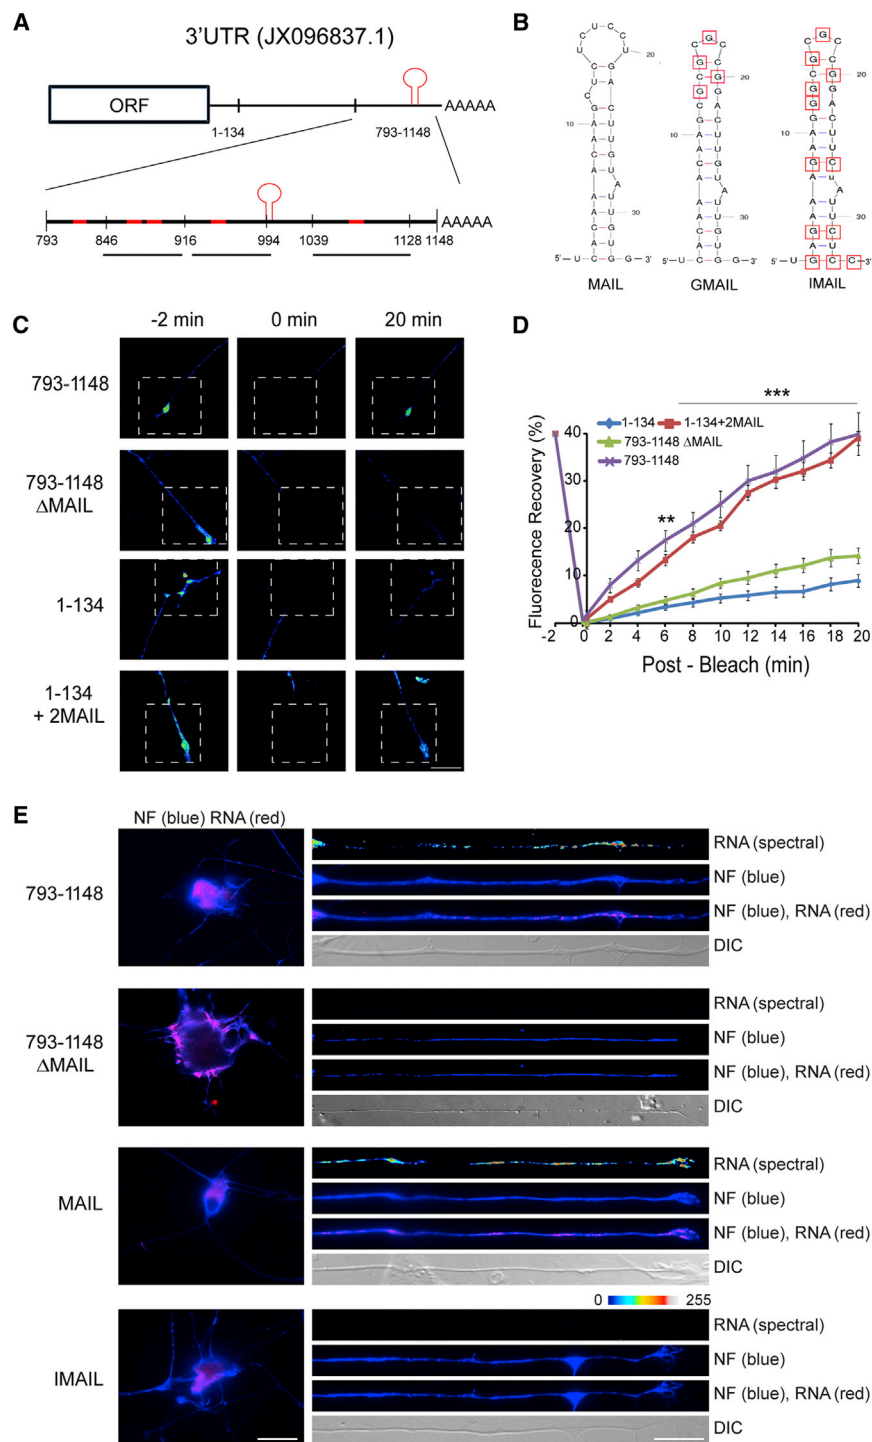

**Figure 2. MAIL, A Localization Motif for Importin  $\beta$ 1 mRNA**

(A) Schematic diagram of segments from the importin  $\beta$  3' UTR (GenBank: JX096837.1) evaluated for axon-localizing activity. Regions predicted to contain stem-loop secondary structures are highlighted in red. The region between 1 and 134 nt encompasses the short form of importin  $\beta$  3' UTR, which is restricted to the cell body. The motif for axonal importin localization (MAIL) is shown as a red stem-loop structure at 991–1,024 nt.

(B) Sequences and schematic structure predictions of the MAIL motif and two derived mutants, GMAIL, with four U-G mutations in the loop region as shown, and IMAIL, which carries the GMAIL mutations together with additional mutations in the stem region, are shown.

(C) Constructs containing deletions or fusions of the MAIL motif as indicated were fused with a destabilized myr-EGFP reporter and transfected to sensory neurons for FRAP analyses, with recovery monitored over 20 min. Representative images from time-lapse sequences before (–2 min) and after photobleaching (0 and 20 min) in the boxed region of interest are shown. For data from additional constructs, see Figure S2A. Scale bar, 25  $\mu$ m.

(D) Quantification of the FRAP analyses shown in (C). Average recoveries are shown (percentage of pre-bleach levels  $\pm$  SEM). Anisomycin-treated neurons were exposed to 50  $\mu$ M inhibitor prior to the imaging sequence. Time points with significant differences in axonal fluorescence compared to that observed in anisomycin-treated cultures are indicated (\*\* $p < 0.001$  and \*\* $p < 0.01$ , two-way ANOVA). For results with additional deletion constructs and anisomycin controls, see Figure S2B.

(E) In situ hybridization on neurons transfected with the indicated constructs. Exposure-matched images show that only GFP mRNA with the MAIL element localizes into axons (right panel), while all reporter mRNAs are clearly expressed in corresponding cell body images (left panel). Scale bars, 25  $\mu$ m (cell body) and 10  $\mu$ m (axons). See also Figure S2C.

See also Figure S2.

S3A, and S3B). Tryptic digest and mass spectrometric analyses identified the RBP nucleolin as a major MAIL-bound component (Figures S3A–S3C). Nucleolin is a multifunctional protein that contains four RNA-binding domains, and it is found in cells both within the nucleus and at the plasma membrane (Abdelmohsen and Gorospe, 2012); hence, it is well placed to play a role in signaling systems linking the cell center with its periphery.

We verified the nucleolin-MAIL interaction by pull-down of rat sciatic nerve axoplasm with RNA probes encoding MAIL, GMAIL, or the Zipcode motif of  $\beta$ -actin mRNA (Kim et al., 2015) (Figure 3B). A reverse pull-down by immunoprecipitation of axoplasm with anti-nucleolin antibody followed by RT-PCR for importin  $\beta$  or  $\beta$ -actin as a control likewise confirmed specific association of neuronal importin  $\beta$  transcript with nucleolin (Figure 3C). To test for a direct interaction of importin  $\beta$  mRNA with nucleolin, we incubated purified recombinant nucleolin with biotinylated MAIL, IMAIL, or  $\beta$ -actin Zipcode RNA motifs, before precipitating the complexes over immobilized streptavidin. Immunoblotting

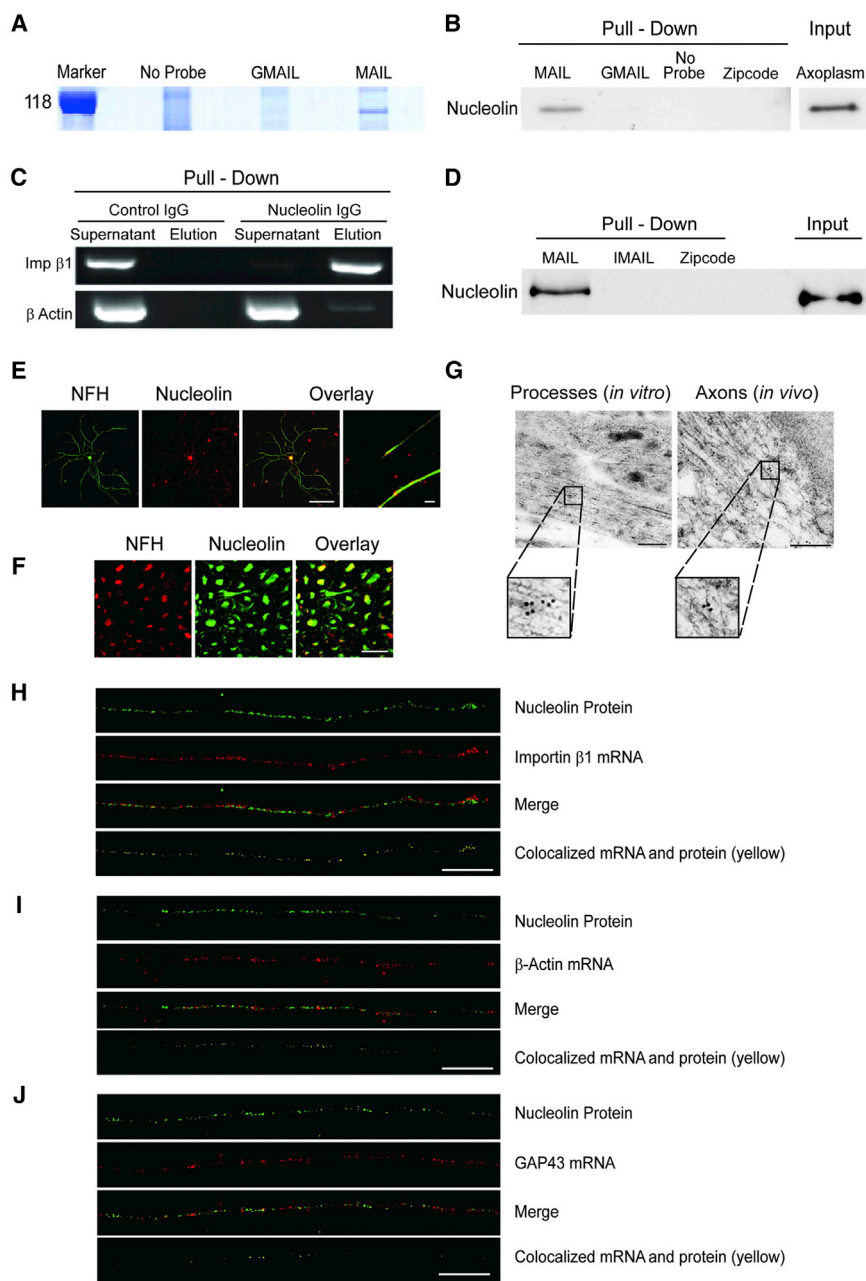

**Figure 3. Axonal Nucleolin Interacts with the Importin  $\beta$ 1 MAIL Motif**

(A) Bovine axoplasm (10 mg/lane) was precipitated on immobilized MAIL or GMAIL RNA motifs, and eluted proteins were separated by 10% SDS-PAGE. The gel region containing the major differential band is shown here and the complete gel is shown in Figure S3A. Mass spectrometry analyses identified nucleolin as the major unique MAIL-bound component (Figures S3A–S3C).

(B) Western blot of nucleolin precipitated from rat sciatic nerve axoplasm with MAIL, GMAIL, or  $\beta$ -actin Zipcode RNA motifs. Precipitates were separated on 10% SDS-PAGE, blotted onto nitrocellulose, and probed with antibody against nucleolin.

(C) Immunoprecipitation of 200  $\mu$ g rat sciatic nerve axoplasm samples with control IgG or anti-nucleolin antibodies followed by RT-PCR for importin  $\beta$ 1 or  $\beta$ -actin mRNAs.

(D) Western blot of recombinant nucleolin precipitated with MAIL, IMAIL, or  $\beta$ -actin Zipcode RNA motifs. Input was 1  $\mu$ g recombinant nucleolin per lane.

(E) Primary cultured rat sensory neurons immunostained with antibodies against nucleolin (red) and NFH (green), revealing nucleolin in both neuronal cell bodies and axons. Scale bar, 20  $\mu$ m; right overlay panel scale bar, 10  $\mu$ m.

(F) Sciatic nerve cross-sections immunostained with antibodies against nucleolin (red) and NFH (green), revealing nucleolin within sensory axons in vivo. Scale bar, 20  $\mu$ m.

(G) Electron micrographs showing immunogold labeling for nucleolin in axons on ultrathin monolayer sections of cultured mouse DRG neurons (left) or of sciatic nerve (right). Nucleolin is present in axons in vitro and in vivo. Scale bars, 200 nm; gold particle diameter, 10 nm.

(H) Colocalization of nucleolin protein (immunostaining, green) and importin  $\beta$ 1 mRNA (FISH, red) in sensory axons. Importin  $\beta$ 1 mRNA colocalized with nucleolin protein (yellow) is shown in a single optical plane (scale bar, 5  $\mu$ m). For cell body signal and scrambled probe control, see Figure S3D. Pearson's correlation coefficient for importin  $\beta$ 1 colocalization with nucleolin  $0.37 \pm 0.04$  ( $n = 29$ ) differs significantly from Pearson's for  $\beta$ -actin or GAP43 (see below) ( $p$  value for importin  $\beta$ 1 versus  $\beta$ -actin  $< 0.004$ ,  $p$  value for importin  $\beta$ 1 versus GAP43  $< 0.0001$ ; ANOVA with Bonferroni post hoc correction in both cases).

(I) Colocalization of nucleolin protein (immunostaining, green) and  $\beta$ -actin mRNA (FISH, red) in sensory axons. Colocalization is shown in yellow in a single optical plane (scale bar, 5  $\mu$ m). For cell body signal and scrambled probe control, see Figure S3D. Pearson's correlation coefficient for  $\beta$ -actin colocalization with nucleolin  $0.19 \pm 0.03$  ( $n = 20$ ).

(J) Colocalization of nucleolin protein (immunostaining, green) and GAP43 mRNA (FISH, red) in sensory axons. Colocalization is shown in yellow in a single optical plane (scale bar, 5  $\mu$ m). For cell body signal and scrambled probe control, see Figure S3D. Pearson's correlation coefficient for GAP43 colocalization with nucleolin  $0.05 \pm 0.01$  ( $n = 48$ ).

See also Figure S3.

confirmed a direct and specific interaction of nucleolin with the importin  $\beta$ 1 MAIL motif (Figure 3D).

We next asked if nucleolin localizes to sensory axons. Immunofluorescence revealed nucleolin in both cell bodies and axons of proprioceptive sensory neurons in culture (Figure 3E) and in

axons of myelinated sensory neurons in vivo (Figure 3F). Both these observations were confirmed by electron microscopy (EM) immunogold labeling (Figure 3G). Immunostaining for nucleolin protein concomitantly with FISH for importin  $\beta$ 1 mRNA revealed extensive axonal colocalization (Figures 3H

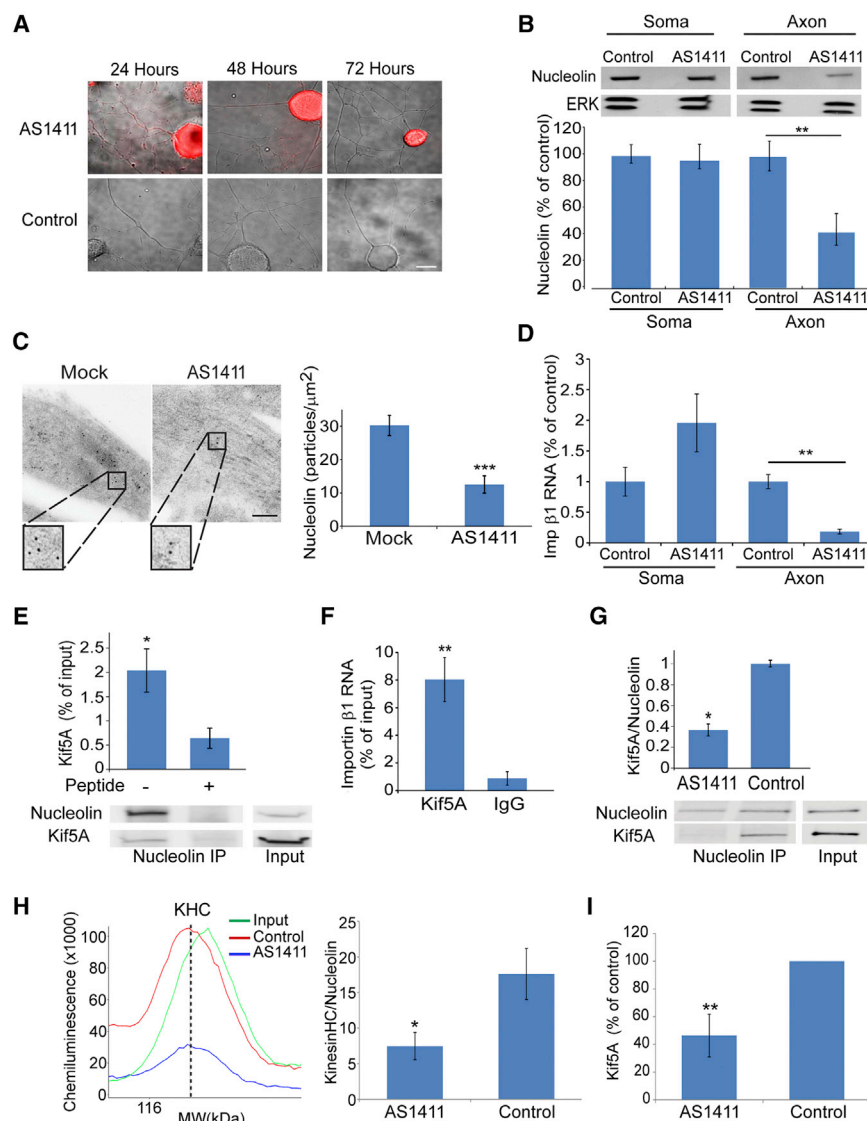

**Figure 4. Depletion of Axonal Nucleolin Reduces Importin  $\beta$ 1 Transcript in Sensory Axons**

(A) Cy3-labeled AS1411 and control aptamers were added to sensory neuron cultures to a final concentration of 20  $\mu$ M. Neurons were fixed at the indicated time points. Scale bar, 10  $\mu$ m. See also Figures S4A and S4B.

(B) Western blots for nucleolin on axon versus cell body extracts from sensory neurons in compartmentalized Boyden chambers treated with AS1411 or control aptamers for 48 hr before transfer to aptamer-free medium for another 24 hr. Quantifications of blots are shown below. Mean  $\pm$  SEM; n = 4; \*\*p < 0.01, Student's t test.

(C) Electron micrographs of cultured DRG neuron processes show immunogold labeling for nucleolin after AS1411 treatment. Scale bar, 200 nm; gold particle, 10 nm. Mean  $\pm$  SEM; n  $\geq$  25; \*\*\*p < 0.001, Student's t test.

(D) Quantification of relative importin  $\beta$ 1 transcript levels by qPCR on cell bodies and axons of cells treated with AS1411 or control DNAs.  $\beta$ -actin served as an internal control and did not change. Mean  $\pm$  SEM; n = 3; \*\*p < 0.01, Student's t test.

(E) ColP of Kif5A with nucleolin from sciatic nerve axoplasm. The control immunoprecipitation is in the presence of a blocking peptide for the nucleolin antibody. A supporting experiment is shown in Figure S4C. Quantification of the Kif5A-nucleolin colP is shown above. Mean  $\pm$  SEM; n = 5; \*p < 0.05, paired Student's t test.

(F) Importin  $\beta$ 1 transcript levels co-precipitated with Kif5A. Mean  $\pm$  SEM; n = 5; \*\*p < 0.01, ratio-paired Student's t test.

(G) Quantification of Kif5A on fluorescent Li-COR western blots of nucleolin immunoprecipitations from sciatic nerve axoplasm, after pre-incubation with AS1411 or control aptamer. Representative blots are shown below the graph. Mean  $\pm$  SEM; n = 3; \*p < 0.05, paired Student's t test. Similar results were obtained from neuronal cultures (Figure S4D).

(H) Automated capillary electrophoresis quantification of kinesin heavy-chain (KHC) immunoreactivity co-precipitated with nucleolin from sciatic

nerve axoplasm, after pre-incubation with AS1411 or control aptamer. Representative traces of the KHC immunoreactive peaks are shown on the left and quantifications are shown on the right. Mean  $\pm$  SEM; n = 3; \*p < 0.05, paired Student's t test.

(I) Quantification of Kif5A protein pulled down by a MAIL RNA probe from sciatic nerve axoplasm pre-incubated with AS1411 or control DNA. Protein levels were quantified by automated capillary electrophoresis. Data are shown as percentage from control. Mean  $\pm$  SEM; n = 9; \*\*p < 0.01, paired Student's t test. See also Figure S4.

and S3D), as compared to similar analyses for  $\beta$ -actin (Figures 3I and S3D) or GAP43 mRNAs (Figures 3J and S3D). Pearson's coefficient calculations showed significantly more colocalization of axonal importin  $\beta$ 1 mRNA with nucleolin than either  $\beta$ -actin or GAP43 mRNAs with nucleolin (Figures 3H–3J). Thus, nucleolin is localized to the axons of sensory neurons both in vivo and in culture and is associated with importin  $\beta$ 1 mRNA in axons.

### Restriction of Nucleolin to Neuronal Cell Bodies Enhances Axon Growth

We then examined the effects of a nucleolin-targeting aptamer on proprioceptive neurons. The AS1411 aptamer is a quadru-

plex-forming oligodeoxynucleotide that internalizes to cells and binds nucleolin with high affinity and specificity (Bates et al., 2009). AS1411 induces death of a variety of tumor cells and has undergone evaluation in clinical trials for leukemia and breast cancer (Berger et al., 2015). Fluorescently labeled AS1411 was internalized at both axons and cell bodies of proprioceptive neurons in culture, but over time in culture the aptamer was concentrated in cell bodies only, leaving the axons clear (Figures 4A and S4A). AS1411 treatment caused a decrease in nucleolin levels in axons without affecting cell body levels (Figure 4B). Similar findings were obtained by quantification of aptamer fluorescence in cell bodies versus axons (Figures S4A and S4B) and by



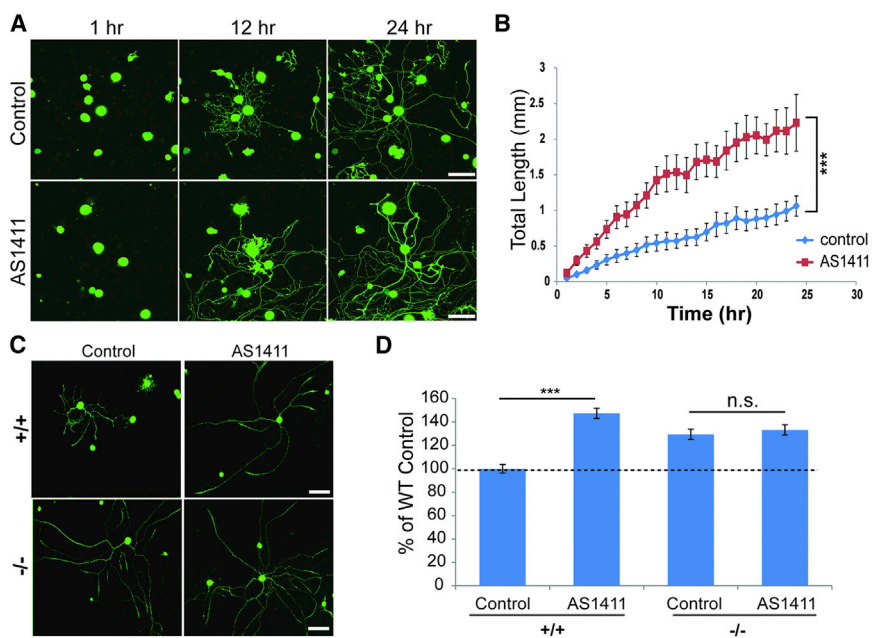

**Figure 5. AS1411 Enhances Sensory Axon Growth Rates in WT, but Not in Importin  $\beta 1$  3' UTR<sup>-/-</sup> Neurons**

(A) Cultured DRG neurons from adult YFP/WT mice were treated with 10  $\mu$ M control or AS1411 aptamer for 48 hr, and then they were replated in fresh medium without aptamer and allowed to re-grow. Representative images at three time points following replating are shown. Scale bar, 100  $\mu$ m.

(B) Quantification of total neurite outgrowth of sensory neurons in culture from the experiment described in (A). Total neurite growth rates in these experiments were  $45.7 \pm 11.2$   $\mu$ m/hr for control versus  $90.1 \pm 16.1$   $\mu$ m/hr for AS1411 treatment. Mean  $\pm$  SEM;  $n \geq 60$  cells per experimental group; \*\*\* $p < 0.001$  for comparison of growth rates, one-way ANOVA.

(C) Representative images of cultured WT or importin  $\beta 1$  3' UTR<sup>-/-</sup> sensory neurons treated with 10  $\mu$ M control or AS1411 aptamer for 48 hr and then replated and cultured for an additional 24 hr in fresh medium without aptamer. Neurons were finally fixed, immunostained for NFH (green), and imaged. Scale bar, 200  $\mu$ m.

(D) Quantification of total neurite outgrowth in the experiment described in (C) reveals a significant increase in axon growth in WT neurons pretreated with AS1411, but not in importin  $\beta 1$  3' UTR<sup>-/-</sup> neurons. Mean  $\pm$  SEM;  $n \geq 300$  cells per experimental group; \*\*\* $p < 0.001$ , Student's *t* test. See also Figure S5.

immunogold labeling on EM sections of aptamer-treated sensory neurons (Figure 4C). AS1411 treatment also significantly reduced importin  $\beta 1$  mRNA in axons, concomitantly with an apparent increase in neuronal cell bodies (Figure 4D).

We surmised that AS1411-induced sequestration of nucleolin and associated importin  $\beta 1$  transcript from axons might be due to perturbation of transport of the RBP complex from the cell soma. We therefore examined whether nucleolin interacts with kinesin motors, and we observed specific co-immunoprecipitation of nucleolin with the kinesin Kif5A (Figure 4E). This interaction was further confirmed by co-precipitation of kinesin heavy chain with nucleolin (Figure S4C). Importin  $\beta 1$  transcript also co-precipitated with Kif5A (Figure 4F), indicating that kinesins transport nucleolin and associated mRNAs into sensory axons. Strikingly, pre-incubation with the AS1411 aptamer significantly reduced co-precipitation of Kif5A or of kinesin heavy chains with nucleolin from axoplasm (Figures 4G and 4H) or from neuronal cultures (Figure S4D). Moreover, Kif5A pull-down from axoplasm by a MAIL RNA probe was significantly reduced after pre-incubation with the AS1411 aptamer (Figure 4I). Hence, AS1411-induced restriction of nucleolin and its mRNA cargo to the neuronal soma is most likely due to the perturbation of nucleolin association with kinesins, thereby preventing transport of the complex from soma to axon.

To evaluate the effects of nucleolin restriction to the soma on axon outgrowth, we pretreated proprioceptive sensory neurons with AS1411 or control aptamer for 48 hr in culture, and then we replated them in fresh medium without aptamer. Under these conditions, AS1411 significantly enhanced total axonal outgrowth (Figures 5A and 5B) without any observable effect

on cell viability. To test whether such effects also could be observed in other neuronal subtypes, we treated cultures of nociceptor neurons in the same manner. As shown in Figure S5, nociceptor neurons pretreated with AS1411 also exhibited significantly more axon growth than cultures pretreated with control aptamer. Finally, we examined whether these aptamer effects were mediated by importin  $\beta 1$  mislocalization. Axon growth after AS1411 pretreatment was increased in WT proprioceptive neurons to levels similar to those seen in importin  $\beta 1$  3' UTR<sup>-/-</sup> neurons not exposed to the aptamer. Moreover, AS1411 had no growth-promoting effect on 3' UTR<sup>-/-</sup> neurons as compared to control aptamer (Figures 5C and 5D). These experiments were quantified at 24 hr after replating of the neurons, and, since it is possible to monitor continuing growth over 96 hr in culture, the lack of effect of AS1411 on 3' UTR<sup>-/-</sup> neurons is not due to saturation of their growth capacity. Taken together, these results indicate that nucleolin restriction to neuronal cell bodies enhances neurite outgrowth by a mechanism dependent on the axonal localization of importin  $\beta 1$  mRNA.

### Perturbation of Nucleolin Affects Size in Non-neuronal Cells

The above data suggest that nucleolin-dependent importin  $\beta 1$  mRNA transport regulates neuronal growth. Since nucleolin is widely expressed in different cell types, we wished to test whether such a mechanism also might function in non-neuronal cells, using 3T3 fibroblasts as a model. We first asked whether importin  $\beta 1$  and nucleolin interact with molecular motors in 3T3 cells. As shown in Figure 6A, importin  $\beta 1$  readily co-precipitated with dynein from 3T3 cell lysate and likewise nucleolin with Kif5B.



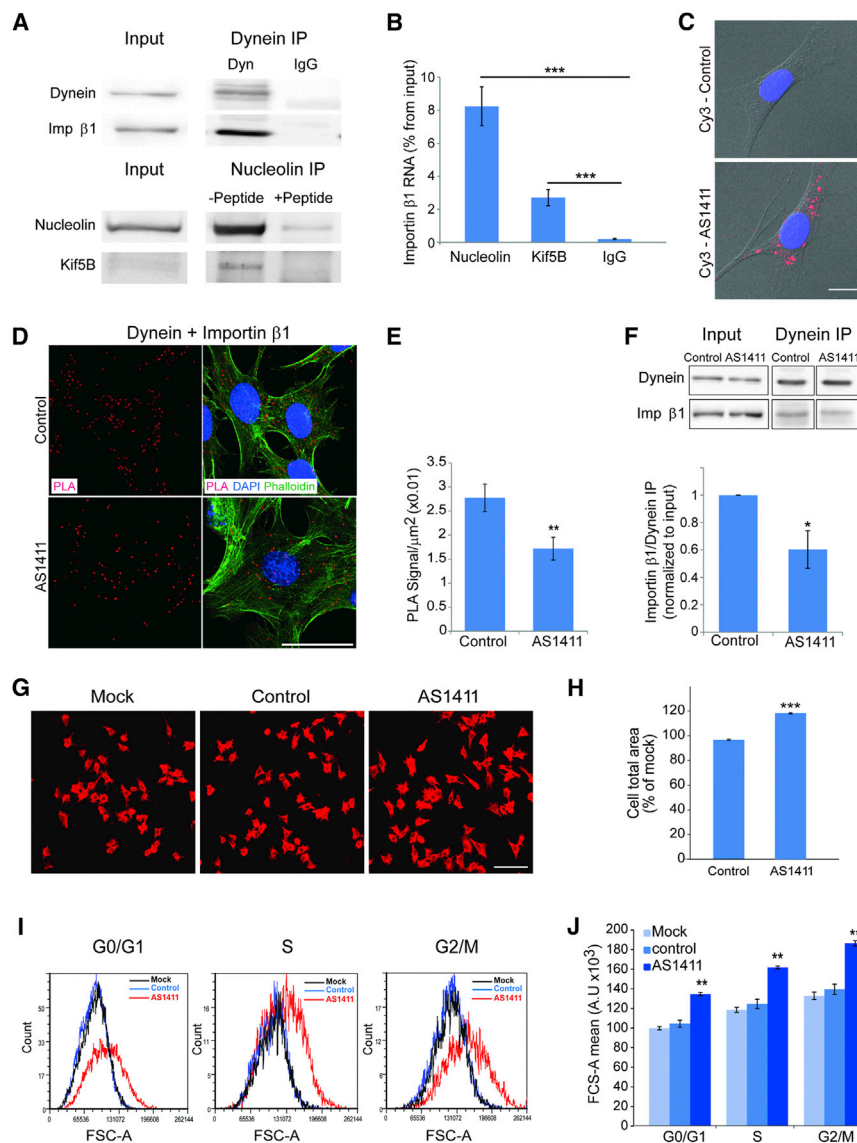

**Figure 6. AS1411 Treatment Increases 3T3 Fibroblast Cell Size**

(A) Western blots showing coIP of importin  $\beta$ 1 with dynein heavy chain 1 and nucleolin with Kif5B from confluent 3T3 cell cultures. Control immunoprecipitations were with non-immune IgG for the dynein immunoprecipitation and with blocking peptide for the precipitating antibody in the nucleolin immunoprecipitation.

(B) Quantification of relative importin  $\beta$ 1 transcript levels after pull-down for Kif5A or nucleolin is shown. Mean  $\pm$  SEM;  $n = 4$ ; \*\*\* $p < 0.001$ , ratio-paired Student's  $t$  test.

(C) Representative images for uptake of AS1411-Cy3 into 3T3 cells are shown. Blue, DAPI; red, AS1411. Scale bar, 10  $\mu$ m.

(D) Representative PLA images of importin  $\beta$ 1-dynein complexes in 3T3 cells incubated for 48 hr with AS1411 or control aptamers. After 48 hr the cells were fixed and stained with phalloidin-Cy3 and for dynein and importin  $\beta$ 1, followed by the PLA probes. Scale bar, 50  $\mu$ m.

(E) Quantification of the assay shown in (D). PLA signal per cell body area was quantified using CellProfiler software, revealing a significant reduction in signal density in 3T3 cells incubated with the AS1411 aptamer. Mean  $\pm$  SEM;  $n = 3$ ; \*\* $p < 0.01$ , Student's  $t$  test.

(F) Representative western blots of importin  $\beta$ 1 co-precipitated with dynein from 3T3 cells after 48 hr in culture in the presence of AS1411 or control aptamers. The quantification below shows a significant decrease in coIP of importin  $\beta$ 1 with dynein after AS1411 treatment. Mean  $\pm$  SEM;  $n = 3$ ; \* $p < 0.05$ , paired Student's  $t$  test.

(G) 3T3 cells were incubated with 10  $\mu$ M AS1411 or control aptamer for 48 hr, after which 20,000 cells were replated for another 24 hr in fresh medium without aptamer before fixing and staining with rhodamine-phalloidin. Representative images are shown. Scale bar, 100  $\mu$ m. See also Figure S6 for higher magnification images of nuclear morphology. (H) Quantification of 3T3 cell area from the experiment described in (G) reveals a significant increase upon AS1411 treatment. Mean  $\pm$  SEM;  $n > 1,000$ ; \*\*\* $p < 0.001$ , Student's  $t$  test. The experiment was replicated on three independent cultures.

(I) 3T3 cell size at different stages of the cell cycle after 48 hr incubation with AS1411 or control aptamers at 10  $\mu$ M, followed by harvesting and incubation with 10  $\mu$ g/ml Hoechst 33342 and 5  $\mu$ g/ml propidium iodide for live cell cycle analyses by FACS. 30,000 events were collected per sample. AS1411 treatment causes a marked increase in cell size, as shown by the right shift in population distribution in comparison to mock and control at all stages of the cell cycle.

(J) Quantification of the FACS described in (I) for three independent experiments reveals a significant increase of cell size upon AS1411 treatment in all cell cycle phases. Mean  $\pm$  SEM;  $n = 3$ ; \*\* $p < 0.01$ , Student's  $t$  test.

See also Figure S6.

Moreover, importin  $\beta$ 1 mRNA was co-precipitated with both nucleolin and Kif5B (Figure 6B). These data indicate that importin  $\beta$ 1 mRNA is transported by a nucleolin-kinesin complex in 3T3 cells and that importin  $\beta$ 1 protein is transported by dynein, similar to the findings in neurons. We therefore set out to test the effects of the AS1411 aptamer in 3T3 cells. Since AS1411 can induce death in various types of cycling cells, we first determined the effects of different concentrations of aptamer on 3T3 cell survival and size (Figures S6A and S6B). Exposure to 10  $\mu$ M AS1411 for 48 hr induced efficient uptake into 3T3 cells (Figure 6C), with concomitant increase in cell area without affecting

cell survival (Figures S6A and S6B). Nuclear area and shape were not perturbed (Figures S6C–S6E). This application regimen was therefore used in all subsequent experiments.

If translation of nucleolin-transported importin  $\beta$ 1 mRNA in the distal region of the cytoplasm is indeed the source of retrogradely transported importin  $\beta$ 1 protein, one would expect to observe reduced levels of importin  $\beta$ 1 interacting with dynein in AS1411-treated cells. Indeed, AS1411-treated cells revealed reduced association of importin  $\beta$ 1 with dynein by PLA analyses (Figures 6D and 6E) and co-immunoprecipitation (Figure 6F). Furthermore, we observed a decrease in MAIL motif

association with kinesin heavy-chain complexes upon AS1411 treatment (Figure S6F), in a manner similar to that previously observed in axoplasm. MAIL-associated nucleolin levels were not changed following AS1411 treatment (data not shown), indicating that, in 3T3 cells similar to neurons, AS1411 reduces the association of nucleolin and its cargo mRNAs with kinesins, therefore reducing their transport to the cell periphery.

We then tested the effects of aptamer treatment on the size of the cells. AS1411 caused a significant increase in cell body area compared to cells exposed to control aptamer (Figures 6G and 6H). To discriminate between overall size increase versus enhanced cell spreading on the substrate, we assessed 3T3 cell size by fluorescence-activated cell sorting (FACS). In this case, cells were exposed to AS1411 or control aptamer for 48 hr, and then they were harvested and labeled with Hoechst and propidium iodide dyes for live cell cycle analysis by flow cytometry. This analysis showed that AS1411 causes a significant increase in cell size at all stages of the cell cycle (Figures 6I and 6J). The latter result suggests that AS1411's effect on cell size is due to a general change in cell metabolism and physiology and not by a single change in a cell cycle checkpoint. Thus, motor-dependent nucleolin-mediated RNA transport regulates size in both cycling fibroblasts and post-mitotic neurons.

### Nucleolin and Importin Localization Regulates Cellular Protein Synthesis

To obtain further insights on how nucleolin might modulate cell size, we examined the effect of its localization on mRNA translation rates. We quantified overall protein synthesis levels by puromycin incorporation (Schmidt et al., 2009), and we observed a significant and marked overall increase in protein synthesis levels in AS1411-treated neurons (Figures S7A and S7B). A less prominent but still significant increase in protein synthesis levels also was observed in importin  $\beta$  3' UTR<sup>-/-</sup> neurons as compared to WT (Figures S7C and S7D). We then examined the effect of nucleolin or importin  $\beta$  1 sequestration on subcellular levels of protein synthesis at axon tips by puromycin labeling and immunostaining. AS1411 treatment reduced protein synthesis levels at axon tips of cultured neurons (Figures 7A, 7B, S7E, and S7F). A similar reduction in axon tip protein synthesis was observed in importin  $\beta$  1 3' UTR<sup>-/-</sup> neurons as compared to WT, and AS1411 treatment did not have any further effect in the 3' UTR<sup>-/-</sup> neurons (Figures 7A and 7B). These results suggest that nucleolin sequestration by the AS1411 aptamer and importin  $\beta$  1 mislocalization in the 3' UTR<sup>-/-</sup> both impact on protein synthesis at axon tips. To examine whether a similar effect is found in cycling cells, we visualized puromycin incorporation in the cytoplasm of aptamer-treated 3T3 fibroblasts (Figure 7C). Quantification of puromycin incorporation levels in peripheral versus total cytoplasm revealed a reduction in the peripheral region of AS1411-treated fibroblast cells as compared to mock or control aptamer-treated cells (Figure 7D). Taken together, these findings show that AS1411 treatment or importin  $\beta$  1 3' UTR KO causes a subcellular shift in protein synthesis, concomitantly with their effects on axon length or fibroblast cell size.

## DISCUSSION

Cell size homeostasis is a ubiquitous feature of biological systems, but a comprehensive answer to the question of how cellular dimensions are encoded or sensed by molecular networks is still lacking (Ginzberg et al., 2015). We recently proposed that growing neurons might sense their axon lengths by bidirectional signaling via molecular motors (Rishal et al., 2012). Experimental testing of model predictions supported a role of kinesin and dynein motors in such a mechanism (Rishal et al., 2012), and others have implicated myosin and kinesin motors in size and growth control in neurons (van Diepen et al., 2009; Watt et al., 2015). However, the nature of the signals involved in motor-dependent size sensing remained elusive. In this paper, we provide evidence that nucleolin-mediated RNA localization affects cell growth and size in both neurons and cycling cells, suggesting that subcellular RNA localization is a key mechanism for cell size regulation (Figure 7E).

The initial observation implicating importin  $\beta$  1 in size regulation was increased growth of importin  $\beta$  1 3' UTR<sup>-/-</sup> sensory axons, analogous to the results we had reported previously from dynein-mutant mice (Rishal et al., 2012). The identification of nucleolin as an RBP for importin  $\beta$  1 mRNA, and the length and size effects observed upon perturbation of nucleolin with AS1411, shed additional light on the mechanism proposed by Rishal et al. (2012). Sequestration of importin  $\beta$  1 by direct targeting of its 3' UTR or by perturbation of nucleolin localization with a specific aptamer induces changes in growth rates and cell size. In essence these findings suggest that local translation of nucleolin cargo mRNAs provides the positive feedback arm of the proposed mechanism and that the retrograde signals are dependent on de-novo-translated proteins trafficked by dynein and importins. RNA localization and local protein translation are ubiquitous features of all eukaryotic cells, and they play critical roles in defining localized proteome specialization (Jung et al., 2014). Previous work had shown that local translation enables communication between distal axonal sites and the nucleus upon injury (Perry et al., 2012), and our current findings expand the scope of such mechanisms to size regulation in growing cells.

Nucleolin seems well suited for a pivotal role in size regulation by nucleus-periphery communication, since it shuttles among nucleus, cytosol, and the cell surface (Hovanessian et al., 2010) and it has a broad phylogenetic distribution, including yeast, plant, and animal cells (Riordan et al., 2011; Abdelmohsen and Gorospe, 2012). Nucleolin contains four RNA-binding domains that may interact with diverse target RNAs via a number of short RNA motifs (Abdelmohsen et al., 2011; Ginisty et al., 2001; Ishimaru et al., 2010; Riordan et al., 2011). None of these motifs is similar in sequence to the importin  $\beta$  1 MAIL element, but, since functional localization motifs in RNA are structure and not sequence based (Andreassi and Riccio, 2009), this is not surprising. A comprehensive characterization of the nucleolin cargo RNA ensemble may reveal additional components of the size-sensing mechanism.

We found that the nucleolin-specific AS1411 aptamer (Bates et al., 2009) attenuates nucleolin association with kinesin motors, thereby enabling its sequestration from distal regions of the cell without affecting overall expression levels of the protein. This is

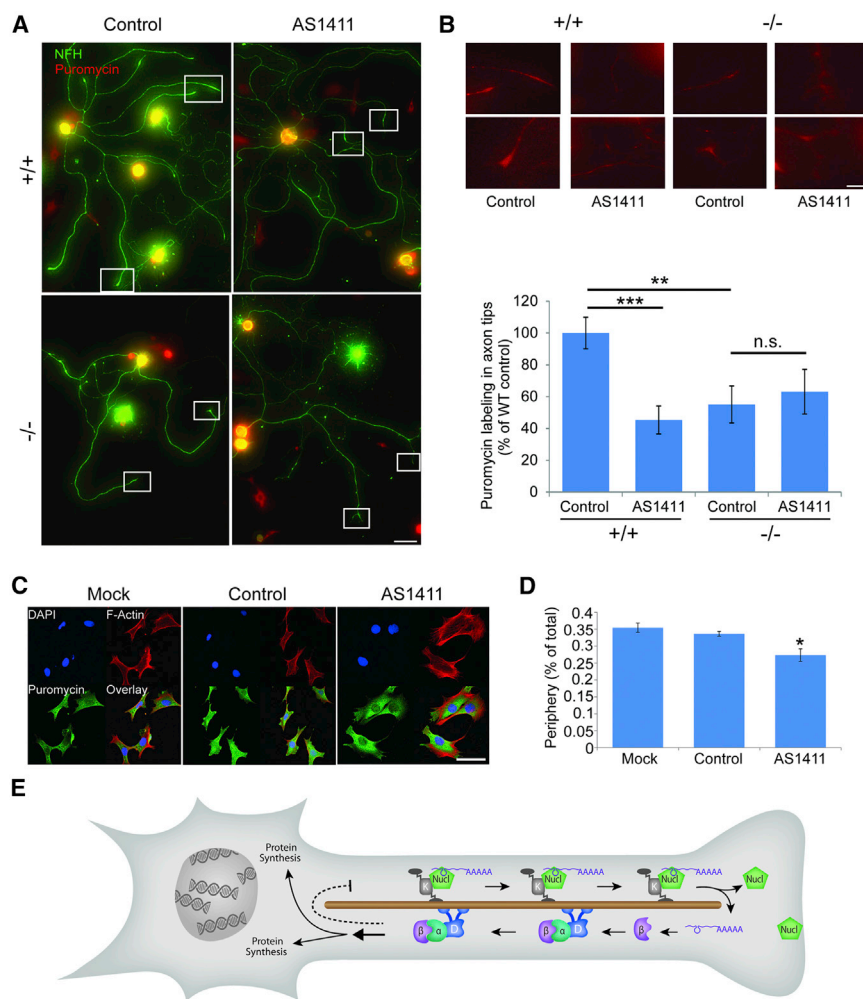

**Figure 7. Nucleolin and Importin  $\beta 1$  Localization Regulate Protein Synthesis**

(A) The translational activity of DRG neurons in culture was assessed by puromycin incorporation. Cultures were grown in the presence of AS1411 or control aptamer for 48 hr, and then they were replated and cultured for an additional 24 hr in fresh medium without aptamer. Neurons were then pulsed with 5 mM puromycin for 10 min at 37°C or preincubated with 40 mM anisomycin for 30 min followed by the 5 mM puromycin pulse, and then they were fixed. Fixed cultures were immunostained for NfH (green) and  $\alpha$ -puromycin (red). Scale bar, 100  $\mu$ m. For anisomycin control, see Figures S7E and S7F.

(B) Representative high-sensitivity zoom images of the boxed regions in (A) reveal protein synthesis in axon tips. Scale bar, 20  $\mu$ m. Quantification reveals a significant decrease in protein synthesis in axon tips of AS1411-treated WT neurons, as well as in importin  $\beta 1$  3' UTR<sup>-/-</sup> neurons. Axon tip synthesis was quantified as ratios of cell body values and then normalized to WT control. Mean  $\pm$  SEM;  $n \geq 80$  cells from three independent cultures; \*\* $p < 0.01$  and \*\*\* $p < 0.001$ , Student's *t* test.

(C) Representative images of cultured 3T3 cells treated with 10  $\mu$ M control or AS1411 aptamer for 48 hr and then replated and cultured for an additional 24 hr in fresh medium without aptamer. The cells subsequently were incubated with puromycin with or without anisomycin as described above, and then they were fixed and stained for F-Actin, DAPI, and  $\alpha$ -puromycin. Scale bar, 50  $\mu$ m. (D) Quantification of puromycin labeling in the cytoplasm of 3T3 cells from the experiment described in (C) reveals a significant decrease in protein synthesis at the cell periphery in AS1411-treated cells. Mean  $\pm$  SEM;  $n \geq 200$  cells from five independent cultures; \* $p < 0.05$ , one-way ANOVA with Bonferroni post hoc test.

(E) Schematic model of the mechanism proposed in this study. Nucleolin binds importin  $\beta 1$  and likely

other mRNAs, and the complex is transported by a kinesin motor to the axon in a neuron or the cell cortex in cycling cells. Upon arrival at the end of the microtubules, the complex is disassembled, with nucleolin likely docking to the plasma membrane. Local translation of the cargo RNAs generates proteins that are retrogradely transported with dynein to influence protein synthesis in the soma. The dashed line indicates a negative feedback loop postulated in the original model (Rishal et al., 2012), the details of which are still unknown.

See also Figure S7.

consistent with a previous study that demonstrated continuous and rapid turnover of cell surface nucleolin in parallel with stability of the nuclear pool (Hovanessian et al., 2010). Interestingly, calcium is required for nucleolin internalization (Hovanessian et al., 2010) and also for importin  $\beta 1$  local translation (Yudin et al., 2008), suggesting that nucleolin-membrane interactions might trigger RNA cargo dissociation and local translation. Perturbation of this process by nucleolin sequestration causes a size increase in both neurons and fibroblasts. These findings raise the intriguing possibility that sequestration of critical components of the pathway, for example, as done here by AS1411 treatment, might open new avenues for accelerating axonal growth. In essence such treatments would cause the size-sensing mechanism to sense a shorter axon than is actually present, inducing the cell to generate the metabolic output required to sustain rapid growth.

The increased growth observed in importin  $\beta 1$  3' UTR<sup>-/-</sup> neurons or upon sequestration of nucleolin from axons or in 3T3 cells is correlated with subcellular changes in protein synthesis. Interestingly, recent work in bacteria and in yeast implicates differential protein synthesis rates in cell size control (Basan et al., 2015; Schmoller et al., 2015). The latter study suggests that size control arises from differences in the size dependence of synthesis of a cell cycle activator versus a cell cycle inhibitor, but it does not show how different protein synthesis pathways can differ in their size sensitivity (Schmoller and Skotheim, 2015). Our findings show that nucleolin and importin  $\beta 1$  perturbation can affect both levels and localization of protein synthesis. The latter finding is especially striking since it provides a plausible transport-regulated mechanism for size-sensitive protein synthesis at cellular extremities, with concomitant size-insensitive synthesis in the cell center. The motor-dependent RNA localization



mechanisms delineated in this study provide a mechanism for size sensing that may work via regulation of the subcellular localization of protein synthesis in large cells. Importin  $\beta$ 1 may act to link critical regulators to the system, since importin-dynein complexes have been shown to transport transcription factors and other regulatory molecules. These and other questions regarding the proposed mechanism remain open for future work.

To summarize, our findings implicate microtubule motors, mRNA localization, and local translation in the regulation of cell size homeostasis. We propose that feedback monitoring of microtubule cytoskeleton length by transport of locally translated mRNAs enables neuron length and cell size sensing.

## EXPERIMENTAL PROCEDURES

### Animals, Preparations, and Cultures

All rat and mouse strains used were bred and maintained at the Veterinary Resources Department of the Weizmann Institute. DRG neuron culture preparations were as previously described (Rishal et al., 2010). The study was conducted in accordance with the guidelines of the Weizmann and University of South Carolina (USC) Institutional Animal Care and Use Committees (IACUCs).

### Capillary Electrophoresis Immuno-quantification

Automated capillary electrophoresis immuno-quantification runs were conducted on a Wes instrument (ProteinSimple) as described (Harris, 2015). Analyses were performed on 15 s or 30 s image exposures.

### DRG Neuron Cultures and Growth Rate Analyses

DRG neurons from the indicated conditions and genotypes were imaged periodically in continuous culture in a Fluoview (FV10i, Olympus) automated confocal laser-scanning microscope with built-in incubator chamber or in an ImageXpress Micro (Molecular Devices) automated microscopy system.

The 20  $\mu$ M AS1411 or control DNAs were added to rat DRG culture media for 48 hr. Cells were replated to tissue culture inserts for 24 hr before isolation of RNA or protein. Adult YFP/WT mice were treated with control or AS1411 aptamer for 48 hr and then replated and imaged for 24 hr as described above. Cultured DRG neurons from WT or importin  $\beta$ 1 3' UTR KO mice were fixed 24 hr after replating and stained with anti-NFH for process length determination. Neuronal morphology was quantified using WIS-Neuromath (Rishal et al., 2013) or MetaXpress (Molecular Devices).

### EM

Samples were prepared for EM as previously described (Rishal et al., 2012). Quantitative analysis was performed using a Fiji macro script written in house.

### Fibroblast Cell Imaging and FACS Analysis

AS1411 DNA or control DNA (10  $\mu$ M) was added to the culture media of 3T3 cells. After 48 hr the cells were replated for another 24 hr without the aptamer for imaging or for live cell cycle analysis by flow cytometry.

### FISH

Antisense oligonucleotide probes for importin  $\beta$ 1 were designed using Oligo 6 software and checked for homology and specificity by BLAST. cRNA probes for GFP reporter mRNA were as previously described (Vuppalanchi et al., 2010). Hybridization to DRG neuronal cultures was as previously described (Willis et al., 2007). For colocalization of RNA and protein, fluorescently labeled Stellaris RNA probes were used (BiosearchTech) as previously described (Spillane et al., 2013).

### FRAP

Dissociated DRG cultures were transfected with importin  $\beta$ 1 3' UTR axonal and cell body variants using Amaxa nucleofection. Terminal axons were subjected to FRAP sequence at 37°C with 488 nm laser line of Leica TCS/SP2 confocal microscope as described with minor modifications (Yudin et al., 2008). Prior to bleaching, neurons were imaged every 30 s for 2 min at 15% laser power. For

photobleaching, the region of interest (ROI) was exposed to 75% laser power every 1.6 s for 40 frames. Recovery was monitored every 60 s over 20 min at 15% laser power. To test for translation dependence, cultures were pretreated with 50  $\mu$ M anisomycin for 30 min before the photobleaching sequence. FRAP quantification and statistical tests are detailed in the [Supplemental Experimental Procedures](#).

### Pull-downs and Mass Spectrometry

Axoplasm from rat or mouse sciatic nerve was extracted as previously described (Rishal et al., 2010), and RBP pull-downs were carried out as described (Doron-Mandel et al., 2016). Bovine axoplasm was extracted by the same procedure, using sciatic nerve dissected on site from fresh bovine carcasses within 20 min of slaughter at the Tnuva Slaughterhouse. Streptavidin magnetic beads were washed several times with different concentrations of NaCl, and they were then incubated with 100  $\mu$ M of the different RNA probes or DNA probes, except for the no-probe sample that was incubated with water. All samples were incubated for 1 hr at 4°C. After washing the resin, 0.5 mg rat axoplasm extract or 10 mg bovine axoplasm extract was applied to the no-probe resin for 30 min to deplete unspecific proteins, and then the unbound fraction was added to the specific probe resin for another 30 min. After intensive washing, bound material was eluted from the resin using SDS sample buffer. The samples from the bovine axoplasm pull-down were loaded into 10% SDS-PAGE gels, followed by Colloidal Blue staining, in-gel digest, and mass spectrometry (see the [Supplemental Experimental Procedures](#)).

### Protein Synthesis Assays by Puromycin Incorporation

Overall protein synthesis levels were quantified by puromycin incorporation as previously described (Schmidt et al., 2009). Subcellular visualization of protein synthesis in situ was by puromycin immunostaining as described (David et al., 2012).

### qPCR

The qPCR was performed using Taqman primer kits for  $\beta$ -actin (normalization control) and importin  $\beta$ 1 or perfecta SYBR green (Quanta Biosciences) and gene-specific primers for importin  $\beta$ 1 and 18S.

### Statistical Methods

Data represent mean  $\pm$  SEM, unless otherwise noted. Groupwise analyses were conducted by one- or two-way ANOVA with Bonferroni post hoc test. Pairwise analyses were conducted by two-tailed Student's *t* tests (unpaired, unless otherwise noted; see figure legends). Statistical analyses were conducted using GraphPad Prism, Synergy Kaleidograph, or Microsoft Excel. Significance was considered as *p* values < 0.05.

## SUPPLEMENTAL INFORMATION

Supplemental Information includes Supplemental Experimental Procedures and seven figures and can be found with this article online at <http://dx.doi.org/10.1016/j.celrep.2016.07.005>.

## AUTHOR CONTRIBUTIONS

M.F., R.B.-T.P., I.R., and E.D.-M. designed the study. R.B.-T.P., I.R., E.D.-M., A.L.K., M.T., S.A., S.K., A.L., M.R., D.Y., P.K.S., C.G., and E.A.H. performed experiments and data analyses. K.F.M. carried out mass spectrometry analyses. V.S. performed EM. W.G. supervised bovine dissections and sample preparation. M.F., J.L.T., A.L.B., A.Y., and C.J.W. supervised research. M.F., R.B.-T.P., I.R., and E.D.-M. wrote the initial manuscript draft. All authors revised the manuscript and approved the final version.

## ACKNOWLEDGMENTS

We thank Nitzan Korem for excellent technical assistance; Ofra Golani and Rinat Nevo for expert advice on image analyses; Shifra Ben-Dor for expert assistance with bioinformatics; Hanna Vega for graphics; and Dalia Gordon, Elizabeth M.C. Fisher, and Giampietro Schiavo for helpful comments on earlier



drafts of this manuscript. This work was supported by funding from the European Research Council (Neurogrowth, M.F.), the Dr. Miriam and Sheldon G. Adelson Medical Research Foundation (M.F., J.L.T., C.J.W., and A.L.B.), the Israel Science Foundation (1284/13, M.F.), the Minerva Foundation (M.F.), the USA-Israel Binational Science Foundation (2011329, M.F. and J.L.T.), the U.S. Army Medical Research Program (W81XWH-13-1-0308, J.L.T. and M.F.), and the NIH (National Institute of General Medical Sciences [NIGMS] 8P41GM103481, A.L.B.; National Institute of Neurological Disorders and Stroke [NINDS] 5R01NS041596, J.L.T.). M.F. is the incumbent of the Chaya Professorial Chair in Molecular Neuroscience at the Weizmann Institute of Science. J.L.T. is the incumbent of the SmartState Chair in Childhood Neurotherapeutics at the University of South Carolina. A.Y. is the incumbent of the Jack & Simon Djanogly Professorial Chair in Biochemistry at the Weizmann Institute of Science.

Received: June 23, 2014

Revised: January 23, 2016

Accepted: July 4, 2016

Published: July 28, 2016

## REFERENCES

- Abdelmohsen, K., and Gorospe, M. (2012). RNA-binding protein nucleolin in disease. *RNA Biol.* 9, 799–808.
- Abdelmohsen, K., Tominaga, K., Lee, E.K., Srikantan, S., Kang, M.J., Kim, M.M., Selimyan, R., Martindale, J.L., Yang, X., Carrier, F., et al. (2011). Enhanced translation by Nucleolin via G-rich elements in coding and non-coding regions of target mRNAs. *Nucleic Acids Res.* 39, 8513–8530.
- Albus, C.A., Rishal, I., and Fainzilber, M. (2013). Cell length sensing for neuronal growth control. *Trends Cell Biol.* 23, 305–310.
- Andreassi, C., and Riccio, A. (2009). To localize or not to localize: mRNA fate is in 3'UTR ends. *Trends Cell Biol.* 19, 465–474.
- Basan, M., Zhu, M., Dai, X., Warren, M., Sévin, D., Wang, Y.P., and Hwa, T. (2015). Inflating bacterial cells by increased protein synthesis. *Mol. Syst. Biol.* 11, 836.
- Bates, P.J., Laber, D.A., Miller, D.M., Thomas, S.D., and Trent, J.O. (2009). Discovery and development of the G-rich oligonucleotide AS1411 as a novel treatment for cancer. *Exp. Mol. Pathol.* 86, 151–164.
- Berger, C.M., Gaume, X., and Bouvet, P. (2015). The roles of nucleolin subcellular localization in cancer. *Biochimie* 113, 78–85.
- David, A., Dolan, B.P., Hickman, H.D., Knowlton, J.J., Clavarino, G., Pierre, P., Bennink, J.R., and Yewdell, J.W. (2012). Nuclear translation visualized by ribosome-bound nascent chain puromylation. *J. Cell Biol.* 197, 45–57.
- Doron-Mandel, E., Alber, S., Oses, J.A., Medzihradsky, K.F., Burlingame, A.L., Fainzilber, M., Twiss, J.L., and Lee, S.J. (2016). Isolation and analyses of axonal ribonucleoprotein complexes. *Methods Cell Biol.* 137, 467–486.
- Feng, G., Mellor, R.H., Bernstein, M., Keller-Peck, C., Nguyen, Q.T., Wallace, M., Nerbonne, J.M., Lichtman, J.W., and Sanes, J.R. (2000). Imaging neuronal subsets in transgenic mice expressing multiple spectral variants of GFP. *Neuron* 28, 41–51.
- Ginisty, H., Amalric, F., and Bouvet, P. (2001). Two different combinations of RNA-binding domains determine the RNA binding specificity of nucleolin. *J. Biol. Chem.* 276, 14338–14343.
- Ginzberg, M.B., Kafri, R., and Kirschner, M. (2015). Cell biology. On being the right (cell) size. *Science* 348, 1245075.
- Hanz, S., Perlson, E., Willis, D., Zheng, J.Q., Massarwa, R., Huerta, J.J., Koltzenburg, M., Kohler, M., van-Minnen, J., Twiss, J.L., and Fainzilber, M. (2003). Axoplasmic importins enable retrograde injury signaling in lesioned nerve. *Neuron* 40, 1095–1104.
- Harrington, A.W., and Ginty, D.D. (2013). Long-distance retrograde neurotrophic factor signalling in neurons. *Nat. Rev. Neurosci.* 14, 177–187.
- Harris, V.M. (2015). Protein detection by Simple Western™ analysis. *Methods Mol. Biol.* 1312, 465–468.
- Hovanessian, A.G., Soundaramourty, C., El Khoury, D., Nondier, I., Svab, J., and Krust, B. (2010). Surface expressed nucleolin is constantly induced in tumor cells to mediate calcium-dependent ligand internalization. *PLoS ONE* 5, e15787.
- Ishimaru, D., Zuraw, L., Ramalingam, S., Sengupta, T.K., Bandyopadhyay, S., Reuben, A., Fernandes, D.J., and Spicer, E.K. (2010). Mechanism of regulation of bcl-2 mRNA by nucleolin and A+U-rich element-binding factor 1 (AUF1). *J. Biol. Chem.* 285, 27182–27191.
- Jung, H., Gkogkas, C.G., Sonenberg, N., and Holt, C.E. (2014). Remote control of gene function by local translation. *Cell* 157, 26–40.
- Kim, H.H., Lee, S.J., Gardiner, A.S., Perrone-Bizzozero, N.I., and Yoo, S. (2015). Different motif requirements for the localization zipcode element of  $\beta$ -actin mRNA binding by HuD and ZBP1. *Nucleic Acids Res.* 43, 7432–7446.
- Lallemend, F., Sterzenbach, U., Hadjab-Lallemend, S., Aquino, J.B., Castelo-Branco, G., Sinha, I., Villaescusa, J.C., Levanon, D., Wang, Y., Franck, M.C., et al. (2012). Positional differences of axon growth rates between sensory neurons encoded by Runx3. *EMBO J.* 31, 3718–3729.
- Marguerat, S., and Bähler, J. (2012). Coordinating genome expression with cell size. *Trends Genet.* 28, 560–565.
- Perry, R.B., Doron-Mandel, E., Iavnilovitch, E., Rishal, I., Dagan, S.Y., Tsoory, M., Coppola, G., McDonald, M.K., Gomes, C., Geschwind, D.H., et al. (2012). Subcellular knockout of importin  $\beta$ 1 perturbs axonal retrograde signaling. *Neuron* 75, 294–305.
- Riordan, D.P., Herschlag, D., and Brown, P.O. (2011). Identification of RNA recognition elements in the *Saccharomyces cerevisiae* transcriptome. *Nucleic Acids Res.* 39, 1501–1509.
- Rishal, I., Michalevski, I., Rozenbaum, M., Shinder, V., Medzihradsky, K.F., Burlingame, A.L., and Fainzilber, M. (2010). Axoplasm isolation from peripheral nerve. *Dev. Neurobiol.* 70, 126–133.
- Rishal, I., Kam, N., Perry, R.B., Shinder, V., Fisher, E.M., Schiavo, G., and Fainzilber, M. (2012). A motor-driven mechanism for cell-length sensing. *Cell Rep.* 1, 608–616.
- Rishal, I., Golani, O., Rajman, M., Costa, B., Ben-Yaakov, K., Schoenmann, Z., Yaron, A., Basri, R., Fainzilber, M., and Galun, M. (2013). WIS-NeuroMath enables versatile high throughput analyses of neuronal processes. *Dev. Neurobiol.* 73, 247–256.
- Sanz, E., Yang, L., Su, T., Morris, D.R., McKnight, G.S., and Amieux, P.S. (2009). Cell-type-specific isolation of ribosome-associated mRNA from complex tissues. *Proc. Natl. Acad. Sci. USA* 106, 13939–13944.
- Schmidt, E.K., Clavarino, G., Ceppi, M., and Pierre, P. (2009). SUnSET, a nonradioactive method to monitor protein synthesis. *Nat. Methods* 6, 275–277.
- Schmoller, K.M., and Skotheim, J.M. (2015). The biosynthetic basis of cell size control. *Trends Cell Biol.* 25, 793–802.
- Schmoller, K.M., Turner, J.J., Köivomägi, M., and Skotheim, J.M. (2015). Dilution of the cell cycle inhibitor Whi5 controls budding-yeast cell size. *Nature* 526, 268–272.
- Söderberg, O., Gullberg, M., Jarvius, M., Ridderstråle, K., Leuchowius, K.J., Jarvius, J., Wester, K., Hydbring, P., Bahram, F., Larsson, L.G., and Landegren, U. (2006). Direct observation of individual endogenous protein complexes in situ by proximity ligation. *Nat. Methods* 3, 995–1000.
- Spillane, M., Ketschek, A., Merianda, T.T., Twiss, J.L., and Gallo, G. (2013). Mitochondria coordinate sites of axon branching through localized intra-axonal protein synthesis. *Cell Rep.* 5, 1564–1575.
- van Diepen, M.T., Parsons, M., Downes, C.P., Leslie, N.R., Hindges, R., and Eickholt, B.J. (2009). MyosinV controls PTEN function and neuronal cell size. *Nat. Cell Biol.* 11, 1191–1196.
- Vuppalaanchi, D., Coleman, J., Yoo, S., Merianda, T.T., Yadhati, A.G., Hossain, J., Blesch, A., Willis, D.E., and Twiss, J.L. (2010). Conserved 3'-untranslated region sequences direct subcellular localization of chaperone protein mRNAs in neurons. *J. Biol. Chem.* 285, 18025–18038.

- Watt, D., Dixit, R., and Cavalli, V. (2015). JIP3 activates kinesin-1 motility to promote axon elongation. *J. Biol. Chem.* *290*, 15512–15525.
- Willis, D.E., van Niekerk, E.A., Sasaki, Y., Mesngon, M., Merianda, T.T., Williams, G.G., Kendall, M., Smith, D.S., Bassell, G.J., and Twiss, J.L. (2007). Extracellular stimuli specifically regulate localized levels of individual neuronal mRNAs. *J. Cell Biol.* *178*, 965–980.
- Yudin, D., Hanz, S., Yoo, S., Iavnilovitch, E., Willis, D., Gradus, T., Vuppalaanchi, D., Segal-Ruder, Y., Ben-Yaakov, K., Hieda, M., et al. (2008). Localized regulation of axonal RanGTPase controls retrograde injury signaling in peripheral nerve. *Neuron* *59*, 241–252.
- Zuker, M. (2003). Mfold web server for nucleic acid folding and hybridization prediction. *Nucleic Acids Res.* *31*, 3406–3415.

**Supplemental Information**

**Nucleolin-Mediated RNA Localization Regulates**

**Neuron Growth and Cycling Cell Size**

**Rotem Ben-Tov Perry, Ida Rishal, Ella Doron-Mandel, Ashley L. Kalinski, Katalin F. Medzihradzky, Marco Terenzio, Stefanie Alber, Sandip Koley, Albina Lin, Meir Rozenbaum, Dmitry Yudin, Pabitra K. Sahoo, Cynthia Gomes, Vera Shinder, Wasim Geraisy, Eric A. Huebner, Clifford J. Woolf, Avraham Yaron, Alma L. Burlingame, Jeffery L. Twiss, and Mike Fainzilber**

*Supplementary Material for:*

**Nucleolin-mediated RNA Localization Regulates Neuron Growth and Cycling  
Cell Size**

Rotem Ben-Tov Perry<sup>1,\*</sup>, Ida Rishal<sup>1,\*</sup>, Ella Doron-Mandel<sup>1,\*</sup>, Ashley L. Kalinski<sup>2</sup>, Katalin F. Medzihradzsky<sup>3</sup>, Marco Terenzio<sup>1</sup>, Stefanie Alber<sup>1</sup>, Sandip Koley<sup>1</sup>, Albina Lin<sup>1</sup>, Meir Rozenbaum<sup>1</sup>, Dmitry Yudin<sup>1</sup>, Pabitra K. Sahoo<sup>2</sup>, Cynthia Gomes<sup>2</sup>, Vera Shinder<sup>4</sup>, Wasim Geraisy<sup>5</sup>, Eric A. Huebner<sup>6</sup>, Clifford J. Woolf<sup>6</sup>, Avraham Yaron<sup>1</sup>, Alma L. Burlingame<sup>3</sup>, Jeffery L. Twiss<sup>2</sup> & Mike Fainzilber<sup>1,#</sup>

<sup>1</sup> Department of Biomolecular Sciences, Weizmann Institute of Science, Rehovot 76100, Israel

<sup>2</sup> Department of Biological Sciences, University of South Carolina, Columbia, SC 29208, U.S.A.

<sup>3</sup> Mass Spectrometry Facility, Department of Pharmaceutical Chemistry, University of California, San Francisco, CA 94158, U.S.A.

<sup>4</sup> Department of Chemical Research Support, Weizmann Institute of Science, Rehovot 76100, Israel

<sup>5</sup> Tnuva, Bet Shean 11710, Israel

<sup>6</sup> F. M. Kirby Neurobiology Center, Boston Children's Hospital and Harvard Medical School, Boston, Massachusetts 02115, U.S.A.

*\*equally contributing authors*

<sup>#</sup> Corresponding author: [mike.fainzilber@weizmann.ac.il](mailto:mike.fainzilber@weizmann.ac.il)

Tel +972 8 934 4266

Fax +972 8 934 4118



## Inventory of Supplementary Material

| <u>Item</u>                                     | <u>Page</u> |
|-------------------------------------------------|-------------|
| Extended Experimental Procedures                | 2           |
| References for Extended Experimental Procedures | 9           |
| Supplementary Figure S1                         | 11          |
| Supplementary Figure S2                         | 13          |
| Supplementary Figure S3                         | 15          |
| Supplementary Figure S4                         | 17          |
| Supplementary Figure S5                         | 19          |
| Supplementary Figure S6                         | 20          |
| Supplementary Figure S7                         | 22          |

## Extended Experimental Procedures

**Animals.** The study was conducted in accordance with the guidelines of the Weizmann and USC Institutional Animal Care and Use Committees (IACUC). Adult (8-12 weeks old) male rats were purchased from Harlan Laboratories. All the mouse strains were bred and maintained at the Veterinary Resources Department of the Weizmann Institute. For live imaging strains of interest were cross-bred with a transgenic line expressing YFP in sensory neurons (Feng et al., 2000).

**Reagents, antibodies and immunofluorescence.** Synthetic DNA aptamers with or without 5'-FITC or Cy3 labeling (AS1411 – GGTGGTGGTGGTTGTGGTGGTGGTGG; Control CCTCCTCCTCCTTCTCCTCCTCCTCC) were from IDT (Jerusalem, Israel). Rabbit anti-NF-H was from Chemicon (AB1989); mouse anti-NF-H clone N52 was from Sigma; Rabbit anti-GFP was from Abcam (ab6556). Rabbit anti Nucleolin was from Abcam (ab50279); Rabbit anti Dynein Heavy chain antibodies were from Santa Cruz (SC-9115) or from Proteintech (DYNC1H1, # 12345-1-AP); Importin  $\beta$ 1 antibodies were either a mouse monoclonal generated in-house (clone 73, raised against full length recombinant importin  $\beta$ 1) or a rabbit polyclonal from MyBioSource (MBS713065). Rhodamine-phalloidin was from Invitrogen (R415). Anti-puromycin was from Millipore (MABE343, clone 12D10). DAPI (Sigma D8417) was used for nuclear staining at 5  $\mu$ g/ml. Fluorescent secondaries were from Jackson ImmunoResearch. Cultured DRG neurons were fixed with 4% paraformaldehyde for immunostaining. Sciatic nerve segments were fixed in 4% paraformaldehyde, frozen, and sectioned at 12  $\mu$ m thickness. Growth cones and axon tips imaging was on a Nikon Ti-LAPP illumination system using an Andor EMCCD camera. The images were captured at X40 magnification with a long distance Nikon super plan fluor ELWD objective (NA 0.6) and analyzed by NIS-ELEMENTS software. Other imaging was in an Olympus FV1000 Confocal laser-scanning microscope at X40 magnification with oil-immersion Olympus UPLSAPO objective (NA 1.35) and analyzed by FV10-ASW2.0 software. For visualization of DAPI, Cy2, Rhodamine RED-X, and Cy5, we used 350, 489, 543 and 633 nm wavelengths, respectively. IRDye 800CW Donkey anti Rabbit was used as the secondary antibody for fluorescent quantification of Western blots, and blots were imaged on an Odyssey Fc imaging system (Li-COR).

**DRG neuron cultures.** DRG culture preparations were as previously described (Hanz et al., 2003; Perlson et al., 2005; Rishal et al., 2010). Briefly, adult rat or mouse DRGs were dissociated for neuron cultures with 100 U of papain followed by 1 mg/ml collagenase-II and 1.2 mg/ml dispase. The ganglia were then triturated in HBSS, 10 mM Glucose, and 5 mM HEPES (pH 7.35). Neurons were recovered through percoll, plated on laminin, and grown in F12 medium. For compartmentalized cultures neurons were plated in Boyden chambers with poly-L-lysine/laminin coated porous membranes (BD Falcon, Bedford, MA) as previously described (Willis and Twiss, 2011).

**Neuronal growth rate analyses.** DRG neurons from the indicated conditions and genotypes were imaged every hour during continuous culture in a Fluoview (FV10i, Olympus) automated confocal laser-scanning microscope with built-in incubator chamber, or in an ImageXpress Micro (Molecular Devices) automated microscopy system. Neuronal morphology was quantified using WIS-Neuromath (Rishal et al., 2013) or MetaXpress (Molecular Devices). Visualization of axonal projections in E11.5 mouse forelimbs was carried out by NFH immunostaining in whole mount, followed by quantification with WIS-Neuromath.

**Fluorescence In-Situ Hybridization (FISH) and immunostaining on cultures.** Antisense oligonucleotide probes for Importin  $\beta$ 1 mRNA were designed using Oligo 6 software and checked for homology and specificity by BLAST. cRNA probes for GFP reporter mRNA in transfected neurons were as previously described (Vuppalanchi et al., 2010). Hybridization to DRG neuronal cultures was as previously described (Willis et al., 2007). For colocalization of RNA and protein, fluorescently-labeled 'Stellaris' RNA probes were used (BiosearchTech) as previously described (Spillane et al., 2013). Hybridization to tissue sections was performed as previously published (Muddashetty et al., 2007), with minor modifications. Briefly, sciatic nerve was fixed for 2 hr in 2% paraformaldehyde. After overnight cryoprotection in 30% sucrose at 4°C, nerves were processed for cryosectioning with 10  $\mu$ m thick sections laid onto *Superfrost<sup>plus</sup>* glass slides (Fisher). Cryostat sections were stored at -20°C until used. Sections were warmed to room temperature, rinsed in PBS for 20 min and then soaked in 0.25% acetic anhydride, 0.1 M triethanolamine hydrochloride, and 0.9% NaCl at pH 8.0 for 10 min. Sections were then rinsed in 2X SSC, dehydrated through a graded series of ethanol (70%, 5 min; 95%, 5 min; and 100%, 5 min), delipidated in chloroform for 5 min and rinsed with 100% ethanol. Sections were washed in 1X SSC and then hybridized overnight at 42°C with 1.2 ng/ $\mu$ l digoxigenin labeled probes in 2X SSC plus 40% formamide, 250  $\mu$ g/ml tRNA, 100  $\mu$ g/ml sheared salmon sperm DNA, and 10% dextran sulfate. Sections were washed in 1X SSC three times for 15 min each

at 50°C, PBS for 5 min, and PBS with 0.3% Triton X-100 for another 5 min. For immunodetection sciatic nerve sections used for *in situ* hybridization were equilibrated in 'IF buffer' (1% heat-shock BSA, 1% protease-free BSA [Roche], 50 mM Tris, and 150 mM NaCl) and then blocked in IF buffer containing 2% heat-shock BSA and 2% fetal bovine serum for 1 hour. After blocking, samples were incubated for 2 hours at room temperature in the following primary antibodies diluted in IF buffer: chicken anti-neurofilament H (1:1,000; Chemicon), chicken anti-neurofilament M (1:1,000; Aves Laboratories), chicken anti-neurofilament L (1:1,000; Aves Laboratories) and rabbit anti-S100 (1:500; Dako). Samples were washed in IF buffer three times and then incubated for 1 hour in the following secondary antibodies diluted in IF buffer: Cy5-conjugated anti-rabbit, FITC-conjugated anti-chicken, and Cy3-conjugated mouse anti-digoxigenin antibodies (1:200 each; Jackson ImmunoRes.). To increase sensitivity of detecting hybridizations in the tissue sections, an additional Cy3-conjugated anti-mouse IgG F(ab') fragments antibody (1:200; Jackson ImmunoRes.) was included with secondary antibody incubation. Coverslips were mounted with gelvatol with 6 mg/ml *n*-propyl gallate (Bassell et al., 1998). Tissues were imaged using a Leica TCS/SP2 confocal system on an inverted Leica DMIRE2 microscope. Pearson's coefficient for potential colocalization of mRNA and protein signals was calculated from confocal image stacks of Stellaris FISH/IF using Volocity software (Perkin Elmer).

**Capillary Electrophoresis Immuno-quantification.** Automated capillary electrophoresis immuno-quantification was carried out on a Wes instrument (ProteinSimple, San Jose, USA). Runs were conducted as described (Harris, 2015), using the default parameters specified by the manufacturer, except for an increase in matrix loading to 18 sec. For quantification of immunoprecipitates (IP), undiluted eluates from the IP procedure were combined with Wes fluorescent master mix and heated for 5 min at 95°C. Anti-kinesin heavy chain antibody was diluted 1:50. All other reagents (antibody diluent, secondary antibodies) were from ProteinSimple. Analyses were performed on 15 or 30 sec image exposures.

**Fluorescence Recovery after Photobleaching (FRAP).** Dissociated DRG cultures from adult Sprague Dawley rats were transfected with myr-eGFP-3'UTR plasmids prior to plating using an Amaxa Nucleofection system. FRAP was performed using a Leica TCS-SP2 confocal microscope fitted with an environmental chamber to cells at 37°C, 5% CO<sub>2</sub>. Forty-eight to seventy-two hours after transfection, GFP-expressing neurons were chosen for FRAP analyses. 40× oil immersion objective (numerical aperture = 0.7) was used for imaging with the pinhole of the confocal set to 4 airy units to ensure that the entire thickness of axons (2–4 μm diameter)



was exposed to laser emission. All experiments employed the 488 nm laser line for GFP excitation and photobleaching with energies as indicated below. GFP emission was collected with a band filter set to 498–530 nm with PMT energy, offset, and gain matched for all collection sets. Prior to photobleaching, neurons were imaged every 30 s for 15 min with 15% laser power. A region of interest (ROI) of the terminal axon was then exposed to 75% laser power for 40 frames at 3.2 s intervals. Recovery of GFP emission was then monitored every 30 s over 30 min using 15% laser power. The raw data from multiple time-lapse experiments was used to calculate from matched images for the bleached ROI. In some experiments, cultures were pretreated with 50  $\mu$ M anisomycin immediately before imaging (i.e., at “prebleach”) as indicated. Image processing and analysis was performed using ImageJ software (NIH, Bethesda, MD). To calculate the mean fluorescence intensity within an ROI that encompassed the terminal axon with growth cone, total fluorescence intensity of the ROI for each time was divided by overall area of the ROI. The percentage of fluorescence recovery at each time point after photobleaching was then normalized to the baseline of the mean fluorescence intensity that had been measured within the ROI of the very first image after photobleaching (0 min) and averaged for all FRAP analyses in a transfection or a treatment. For each construct tested, FRAP was analyzed on at least three neurons per well and repeated over two transfection runs. Data was analyzed using GraphPad Prism 4 software package (San Diego, CA). Two-way ANOVA was used to compare the time for the recovery between transfections and between treatments followed by Bonferroni post hoc multiple comparisons. All values were expressed as mean  $\pm$  SEM and significance was set at  $p < 0.05$ .

**Axoplasm pull-downs and proteomics analyses.** Axoplasm from rat or mouse sciatic nerve was extracted as previously described (Rishal et al., 2010), and RBP pull-downs were carried out as described (Doron-Mandel et al., 2015). Bovine axoplasm was extracted by the same procedure, using sciatic nerve dissected from fresh bovine carcasses within 20 minutes of slaughter. Streptavidin magnetic beads were washed several times with different concentrations of NaCl, and were then incubated with 100  $\mu$ M of the different RNA probes, except for the no probe sample that was incubated with water. All samples were incubated for 1 hour at 4°C. After washing the resin, 0.5 mg of rat axoplasm extract or 10 mg bovine axoplasm extract was applied to the no probe resin for 30 minutes to deplete unspecific proteins and then the unbound fraction was added to the specific probe resin for another 30 minutes. After intensive washing, bound material was eluted from the resin using SDS sample buffer. The samples from the bovine axoplasm pull-down were loaded into 10% SDS-PAGE gels, followed by Colloidal Blue staining, in-gel tryptic digest and mass spectrometry. Briefly, SDS and CBB were removed with

a 25 mM ammonium bicarbonate solution in water: acetonitrile 1:1; disulfide bridges were reduced with DTT and alkylated with iodoacetamide. After the removal of the reagent excess the proteins were digested with side-chain protected porcine trypsin (Promega) at 37°C, for approximately 4 hrs. The resulting peptides were extracted, concentrated and subjected to LC/MS/MS analysis on a linear ion trap - Fourier transform ion cyclotron resonance hybrid mass spectrometer, LTQ FT(ICR) (Thermo Scientific) directly linked to a nanoACQUITY UPLC system (Waters). The peptide fractionation was performed on a C18 column (75µm x 150 mm) at a flowrate of ~400 µl; solvent A was 0.1% formic acid in water, solvent B was 0.1% formic acid in acetonitrile. A linear gradient was applied from 2% to 35% organic in 40 minutes. Data were acquired for 60 min following sample injection, in a data-dependent manner. The 6 most abundant multiply charged ions of the MS survey were selected for MS/MS analysis; dynamic exclusion was enabled. Precursor ions were measured in the magnet, CID experiments were performed in the linear trap. Peaklists were generated using the in-house software PAVA, database searches were performed using Protein Prospector v.5.4.2 on the UniProtKB.2009.12.15 database was searched – each sequence belonging to *Homo sapiens*, *Bos taurus* or *Sus scrofa* was also randomized and added to the database. Eventually 239070/21095996 entries were searched. Only tryptic peptides were considered, 1 missed cleavage was permitted. Mass accuracy 20 ppm and 0.8 Da, for precursor ions and CID fragments, respectively. Fixed modification: carbamidomethyl Cys; variable modifications: Met oxidation, cyclization of N-terminal Gln, and acetylation of protein N-termini; 2 such modifications/peptide were permitted. *Acceptance criteria*: Minimum scores 22 and 15, for proteins and peptides, respectively. Maximum E-values: 0.05 and 0.1, for proteins and peptides, respectively. Homologous proteins that were identified from at least 1 unique sequence were retained for further analyses.

Quantitative mRNA Analysis by Real-Time PCR. QPCR was performed as previously described (Nilsson et al., 2005). Briefly, axonal or soma RNA was extracted from Boyden chamber inserts using Trizol (TRI, Sigma-Aldrich) according to the manufacturer's protocol. RNA was reverse transcribed (Superscript III, Invitrogen) and Real-Time PCR was performed using Taqman (Applied Biosystems) primer kits for  $\beta$ -actin (normalization control) and Importin  $\beta$ 1, or perfecta SYBR green (Quanta biosciences) and gene specific primers for Importin  $\beta$ 1, Kif5A, Kif5B and 18S RNA.

**Fibroblast cultures and FACS analyses.** NIH 3T3 cells were grown in DMEM medium supplemented with 10% FBS and 1% penicillin-streptomycin (Sigma) at 37°C in 5% CO<sub>2</sub>. Cells were harvested with PBS and incubated with 10 µg/ml Hoechst 33342 (Sigma, B 2261) at 37°C for 45 minutes and 5 µg/ml Propidium Iodide (Molecular probes, P-1304) for flow cytometry analyses on a LSRII cell analyzer, collecting 30,000 events per sample. Data was processed using FCS-Express software.

**Electron Microscopy.** Neurons were cultured on sapphire disks and fixed 48 hr after plating using high pressure freezing (HPF) in a Bal-Tec HPM10, followed by freeze substitution, washing, embedding into HM20 resin, and ultrathin sectioning (70–90 nm). Sciatic nerves were fixed in 0.1% glutaraldehyde, washed, cut to 100 µm sections by vibrotome, then underwent high pressure freezing (HPF) in a Bal-Tec HPM10, followed by freeze substitution, washing, embedding into LR Gold resin, and ultrathin sectioning (70–90 nm). Sections were collected on nickel grids coated by formvar film. For immunostaining, grids were first reacted with anti-dynein HC1, followed by anti-Importin β1 when required for double-labeling, and secondary anti-rabbit IgG with different sizes of gold particles. Single labeling was also performed for Importin β1 and nucleolin. The grids were then stained in uranyl acetate and lead citrate and analyzed under 120 kV on a Tecnai 12 (FEI) Transmission Electron Microscope with a EAGLE (FEI) CCD camera using TIA software. Quantitative analysis was performed by Fiji (Schindelin et al., 2012), using a macro script written in-house to identify gold particles of specified diameter (8-15 nm). The macro segments dark objects by applying rolling-ball background subtraction, thresholding with fixed value and separating touching objects using watershed. Relevant regions of interest (ROI) can then be selected for analysis. All particle counts were normalized to the selected ROI area.

**Proximity Ligation Assay (PLA).** PLA was performed using the Duolink system (Sigma) according to the manufacturer's instructions, with the following primary antibodies: rabbit anti-Dynein HC (SC-9115, 1:50) or rabbit anti-DYNC1H1 (Proteintech, # 12345-1-AP, 1:100) and mouse anti-Importin β1 (Clone 73, 1:2000). Interactions were detected using Sigma PLA probe anti-mouse minus DUO92004, anti-rabbit plus DUO92002, and detection kits Red DUO92008 or FarRed DUO92013. Staining was done with Phalloidin rhodamine for 30 min at RT. Quantification was performed with Cell Profiler.

**Puromycin labeling.** Puromycilation was performed as previously described (David et al., 2012; tom Dieck et al., 2015) with minor modifications. Neurons or NIH 3T3 cells were pre-incubated with Anisomycin 40 mM (Sigma, A9789) for 30 min followed by puromycin 5 mM (Sigma, P8833) for 10 min. Imaging of neuronal puromycilation was by a Nikon eclipse - Ti-E microscope at 40X magnification using an Andor EMCCD camera. Analysis of puromycin labeling in axon tips was done by NIS-Elements software. Quantification of puromycin labeling on confocal images of 3T3 cells was done using an ImageJ macro. Peripheral staining was defined by a mask formed by a ring spanning  $x$  pixels from the plasma membrane, where  $x$  is a function of the average area per cell calculated for each image according to the formula  $x = (10 * \text{Area}) / \text{Average\_Area\_Control\_Cells}$ , to correct for the possible confounding differences in periphery/total ratios in cells of different size. Puromycin staining intensity in different cytoplasmic regions was calculated after subtraction of the nuclear area.

## References cited for Extended Experimental Procedures

- Bassell, G.J., Zhang, H., Byrd, A.L., Femino, A.M., Singer, R.H., Taneja, K.L., Lifshitz, L.M., Herman, I.M., and Kosik, K.S. (1998). Sorting of beta-actin mRNA and protein to neurites and growth cones in culture. *J Neurosci* *18*, 251-265.
- David, A., Dolan, B.P., Hickman, H.D., Knowlton, J.J., Clavarino, G., Pierre, P., Bennink, J.R., and Yewdell, J.W. (2012). Nuclear translation visualized by ribosome-bound nascent chain puromycylation. *J Cell Biol* *197*, 45-57.
- Doron-Mandel, E., Alber, S., Oses, J.A., Medzihradzky, K.F., Burlingame, A.L., Fainzilber, M., Twiss, J.L., and Lee, S.J. (2015). Isolation and analyses of axonal ribonucleoprotein complexes. In *Methods in Cell Biology*, p. doi:10.1016/bs.mcb.2015.1006.1010.
- Feng, G., Mellor, R.H., Bernstein, M., Keller-Peck, C., Nguyen, Q.T., Wallace, M., Nerbonne, J.M., Lichtman, J.W., and Sanes, J.R. (2000). Imaging neuronal subsets in transgenic mice expressing multiple spectral variants of GFP. *Neuron* *28*, 41-51.
- Hanz, S., Perlson, E., Willis, D., Zheng, J.Q., Massarwa, R., Huerta, J.J., Koltzenburg, M., Kohler, M., van-Minnen, J., Twiss, J.L., *et al.* (2003). Axoplasmic importins enable retrograde injury signaling in lesioned nerve. *Neuron* *40*, 1095-1104.
- Harris, V.M. (2015). Protein detection by Simple Western analysis. *Methods Mol Biol* *1312*, 465-468.
- Muddashetty, R.S., Kelic, S., Gross, C., Xu, M., and Bassell, G.J. (2007). Dysregulated metabotropic glutamate receptor-dependent translation of AMPA receptor and postsynaptic density-95 mRNAs at synapses in a mouse model of fragile X syndrome. *J Neurosci* *27*, 5338-5348.
- Nilsson, A., Moller, K., Dahlin, L., Lundborg, G., and Kanje, M. (2005). Early changes in gene expression in the dorsal root ganglia after transection of the sciatic nerve; effects of amphiregulin and PAI-1 on regeneration. *Brain Res Mol Brain Res* *136*, 65-74.
- Perlson, E., Hanz, S., Ben-Yaakov, K., Segal-Ruder, Y., Seger, R., and Fainzilber, M. (2005). Vimentin-dependent spatial translocation of an activated MAP kinase in injured nerve. *Neuron* *45*, 715-726.



Rishal, I., Golani, O., Rajman, M., Costa, B., Ben-Yaakov, K., Schoenmann, Z., Yaron, A., Basri, R., Fainzilber, M., and Galun, M. (2013). WIS-NeuroMath enables versatile high throughput analyses of neuronal processes. *Dev Neurobiol* 73, 247-256.

Rishal, I., Michaelevski, I., Rozenbaum, M., Shinder, V., Medzihradzky, K.F., Burlingame, A.L., and Fainzilber, M. (2010). Axoplasm isolation from peripheral nerve. *Dev Neurobiol* 70, 126-133.

Schindelin, J., Arganda-Carreras, I., Frise, E., Kaynig, V., Longair, M., Pietzsch, T., Preibisch, S., Rueden, C., Saalfeld, S., Schmid, B., *et al.* (2012). Fiji: an open-source platform for biological-image analysis. *Nat Methods* 9, 676-682.

Spillane, M., Ketschek, A., Merianda, T.T., Twiss, J.L., and Gallo, G. (2013). Mitochondria coordinate sites of axon branching through localized intra-axonal protein synthesis. *Cell Rep* 5, 1564-1575.

tom Dieck, S., Kochen, L., Hanus, C., Heumuller, M., Bartnik, I., Nassim-Assir, B., Merk, K., Mosler, T., Garg, S., Bunse, S., *et al.* (2015). Direct visualization of newly synthesized target proteins in situ. *Nat Methods* 12, 411-414.

Vuppalanchi, D., Coleman, J., Yoo, S., Merianda, T.T., Yadhati, A.G., Hossain, J., Blesch, A., Willis, D.E., and Twiss, J.L. (2010). Conserved 3'-untranslated region sequences direct subcellular localization of chaperone protein mRNAs in neurons. *J Biol Chem* 285, 18025-18038.

Willis, D.E., and Twiss, J.L. (2011). Profiling axonal mRNA transport. *Methods Mol Biol* 714, 335-352.

Willis, D.E., van Niekerk, E.A., Sasaki, Y., Mesngon, M., Merianda, T.T., Williams, G.G., Kendall, M., Smith, D.S., Bassell, G.J., and Twiss, J.L. (2007). Extracellular stimuli specifically regulate localized levels of individual neuronal mRNAs. *J Cell Biol* 178, 965-980.

## Supplemental Figures

Figure S1 – connected to Figure 1

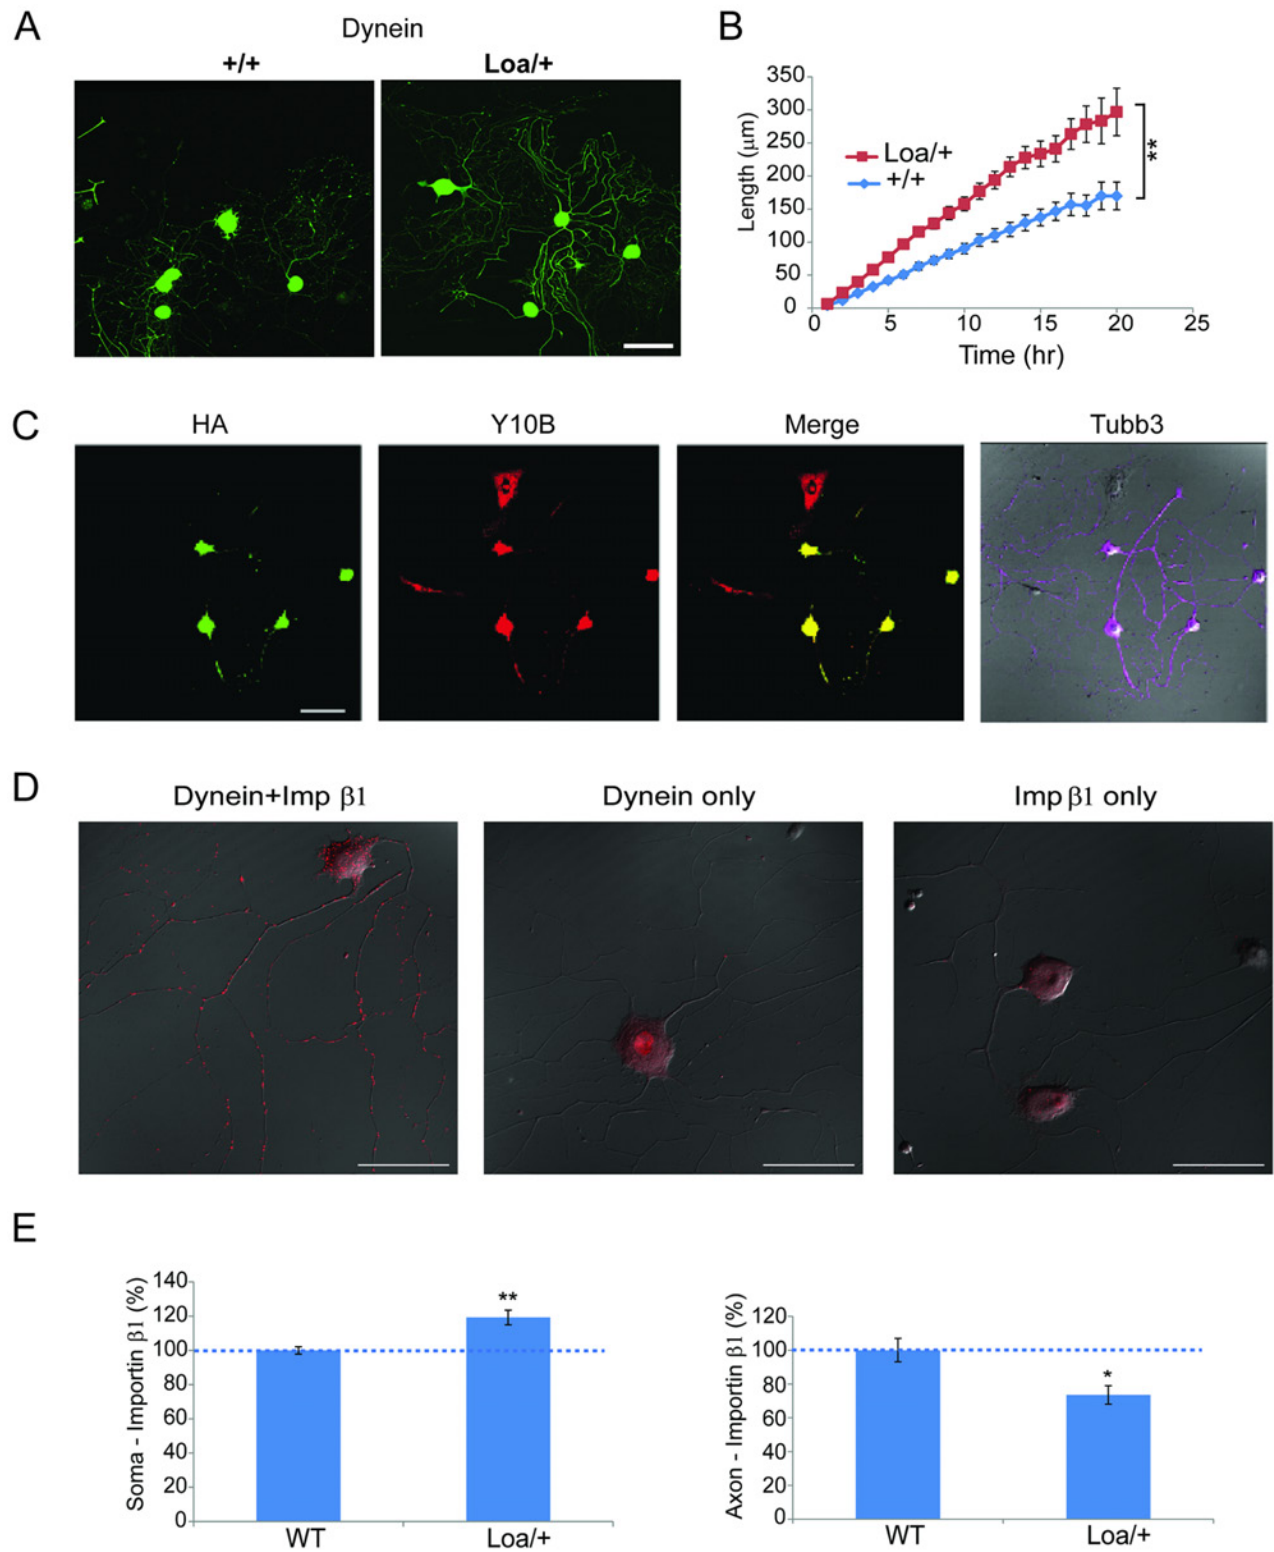

(A) Representative fluorescent images after 48 hr culture of YFP expressing DRG neurons from adult wild type or *Loa* heterozygote mice. Scale bar 100  $\mu\text{m}$ .

(B) Quantification of time-lapse imaging of YFP expressing DRG neurons over 48 hr in culture. Images were taken every hour in a Fluoview FV10i incubator microscope. 3x3 montages of neighboring acquisition sites were analyzed using ImageJ. Longest neurite growth rates in these experiments were  $6.5 \pm 1.2 \mu\text{m/hr}$  for wild type versus  $12.7 \pm 1.6 \mu\text{m/hr}$  for *Loa*/+ mice, Mean  $\pm$  SEM,  $n \geq 30$  cells per experimental group, \*\*  $p < 0.01$  for comparison of growth rates (One-way ANOVA).

(C) DRG neuron cultures from *Islet1-Ribotag* mice were stained with HA, Y10B (Ribosomal RNA) and Tubb3 antibodies before confocal imaging. The HA staining is specific for axons. Scale bar 50  $\mu\text{m}$ .

(D) Representative images from proximity ligation assay (PLA) to identify importin  $\beta$ 1-dynein complexes in DRG neurons grown for 48 hr in culture. After 48 hr the neurons were fixed with 4% PFA and stained with dynein heavy chain 1 (rabbit polyclonal) and importin  $\beta$ 1 (mouse monoclonal) antibodies, followed by rabbit and mouse PLA probes. After developing the reaction, imaging was carried out on a confocal microscope at 60X oil magnification. Scale bar 50  $\mu\text{m}$ .

(E) Quantification of Importin  $\beta$ 1 protein levels in soma versus axon compartments of sensory neurons in culture reveals a significant increase in cell bodies and a decrease in axons of cultures from *Loa* heterozygote (*Loa*/+) mice as compared to wild type. DRG neurons isolated from WT or *Loa*/+ mice were grown in Boyden chambers for 48 hours before protein extraction from soma and axon compartments. Importin  $\beta$ 1 levels in protein extracts were determined by immunoprecipitation in a Wes (ProteinSimple) automated capillary electrophoresis apparatus. Average  $\pm$  SEM,  $n = 5$  per genotype \*,  $p < 0.05$ , \*\*,  $p < 0.01$  (Student's t-test).

Figure S2 – connected to Figure 2

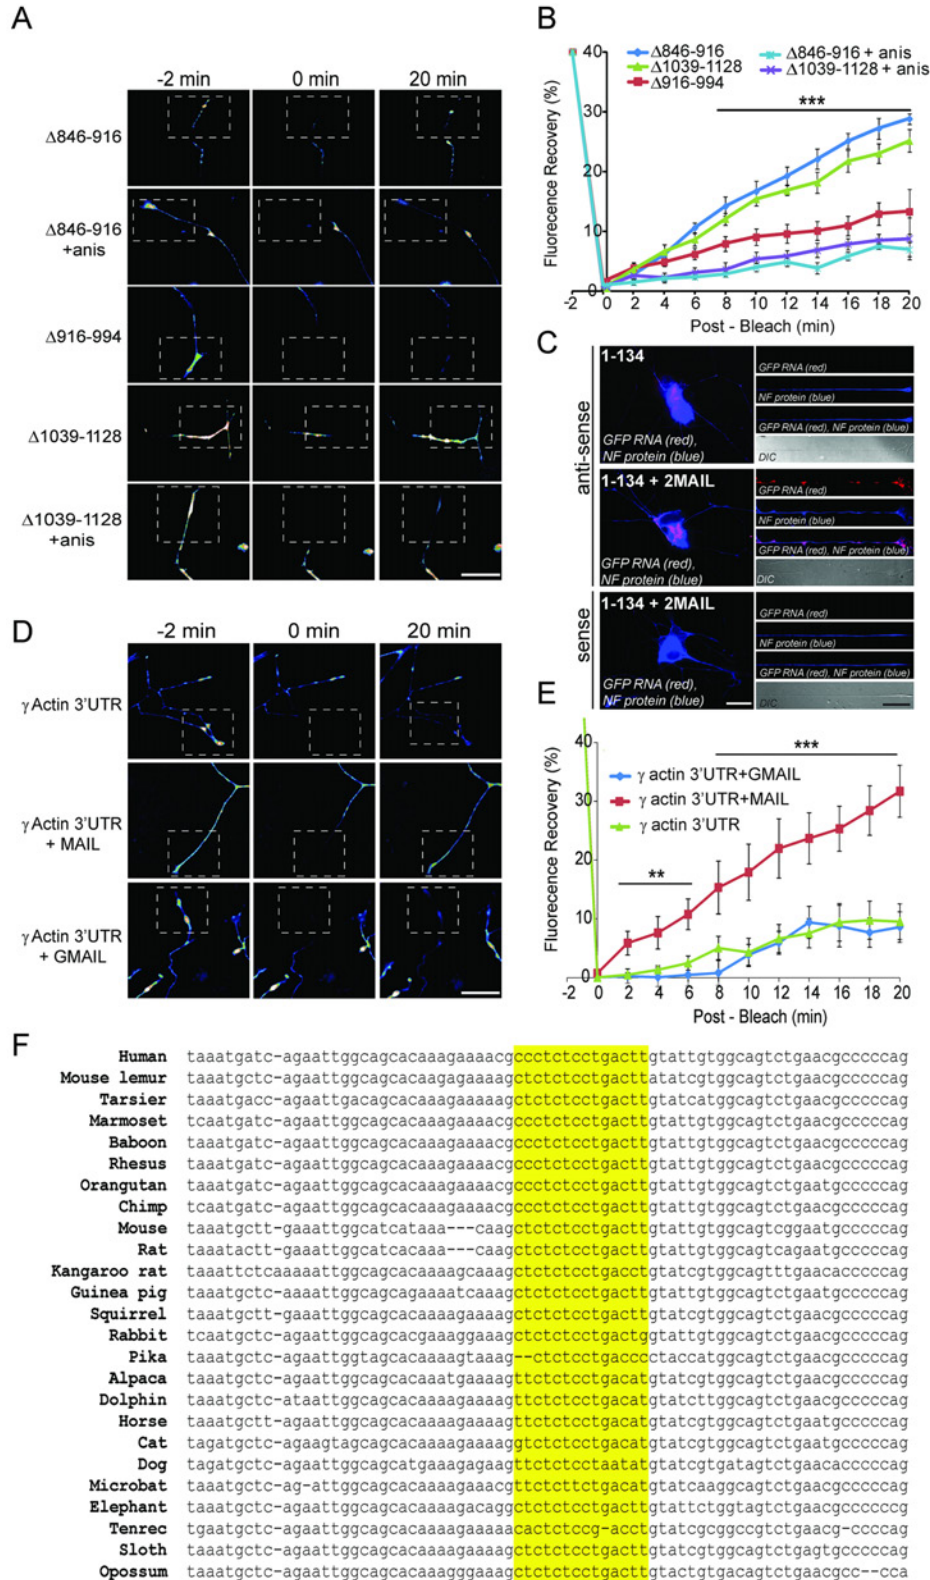

(A) The indicated deletion constructs of the importin  $\beta$ 1 3'UTR were fused with a destabilised myr-EGFP reporter and transfected to sensory neurons for FRAP analyses, with recovery monitored over 20 min. Representative images from time-lapse sequences before (-2 min) and after photobleaching (0 and 20 min) in the boxed region of interest are shown. Scale bar 25  $\mu$ m.

(B) Quantification of the FRAP analyses shown in A. Average recoveries are shown (% of pre-bleach levels  $\pm$  SEM). Anisomycin treated neurons were exposed to 50  $\mu$ M of the inhibitor prior to pre-bleach imaging. Time points with significant differences in axonal fluorescence compared to that observed in anisomycin-treated cultures are indicated by \*\*\* for  $p < 0.001$  (Two-way ANOVA).

(C) In situ hybridization on neurons transfected with constructs containing the importin  $\beta$ 1 1-134 3'UTR region, or the 1-134 segment fused to two MAIL sequences, as indicated. Exposure matched images show that only GFP mRNA with the MAIL motif localizes into axons (right), while both reporter mRNAs are clearly expressed in corresponding cell body images (left). Sense probe hybridization for specificity control shown below. Scale bars, cell body panels 20  $\mu$ m, axon panels 10  $\mu$ m).

(D) Representative images from time-lapse sequences before (-2 min) and after photobleaching (series from 0 to 20 min) of adult DRG neurons transfected with  $\gamma$  actin 3' UTR constructs fused to myr-GFP.  $\gamma$  actin 3'UTR axonal fluorescence compared to  $\gamma$  actin 3'UTR fused to MAIL or to GMAIL. The boxed regions represent the area subjected to photobleaching with recovery monitored over 20 min. Scale bar 25  $\mu$ m.

(E) Quantification of the FRAP experiments shown in D over multiple time-lapse sequences. Average recoveries are shown as % of pre-bleach levels  $\pm$  SD,  $n > 6$ , \*\* denotes  $p < 0.01$ , \*\*\* denotes  $p < 0.001$  (Two-way ANOVA).

(F) MAIL sequence conservation in importin  $\beta$ 1 from different species (UCSC genome browser). The loop region is highlighted in yellow.



Figure S3 – connected to Figure 3

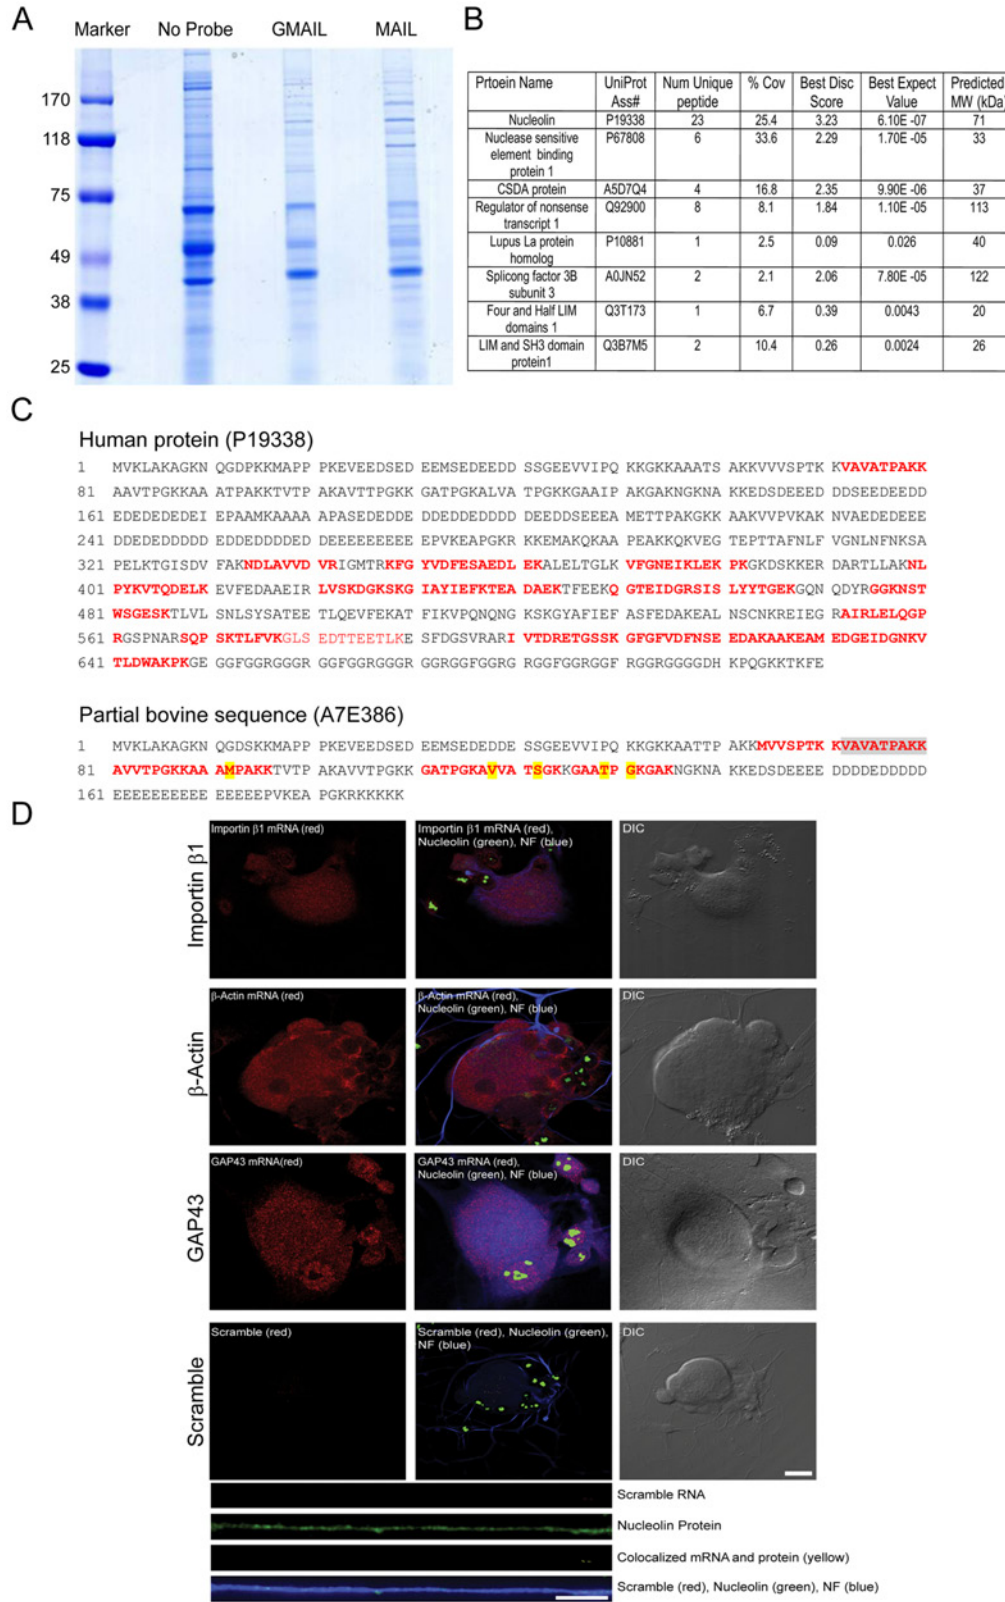

(A) 10% SDS-PAGE of proteins from bovine axoplasm bound by biotinylated MAIL or GMAIL RNA probes and precipitated on immobilized streptavidin. 10 mg bovine axoplasm extract were used as input for each pull-down lane.

(B) Proteins identified by mass spectrometry from MAIL but not control pull-downs. Protein identifications are from the UniProtKB.2009.12.15 database.

(C) Nucleolin was not detected in the two control pull-downs and was identified with a large number of unique peptides and high sequence coverage from MAIL pull-downs. The identification was mostly based on the homologous human protein sequence, since the UniProt database contains only a partial sequence for the bovine protein. 18 unique peptides were identified meeting the acceptance criteria from the pre-filtered pull-down experiment, and 23 sequences without prefiltering. Grey shading indicates an identical sequence stretch between species, while the highlights in the identified sequences indicate the amino acid differences detected between human and bovine proteins.

(D) FISH on neuronal cell bodies for importin  $\beta$ 1,  $\beta$  actin or GAP43 transcripts as indicated, or scrambled sequence control (all in red), together with immunostaining for nucleolin (green). Scrambled sequence control is shown also for axons visualized by NF immunostaining (blue). Scale bars: cell body = 10  $\mu$ m, axon = 5  $\mu$ m.

**Figure S4** – connected to Figure 4

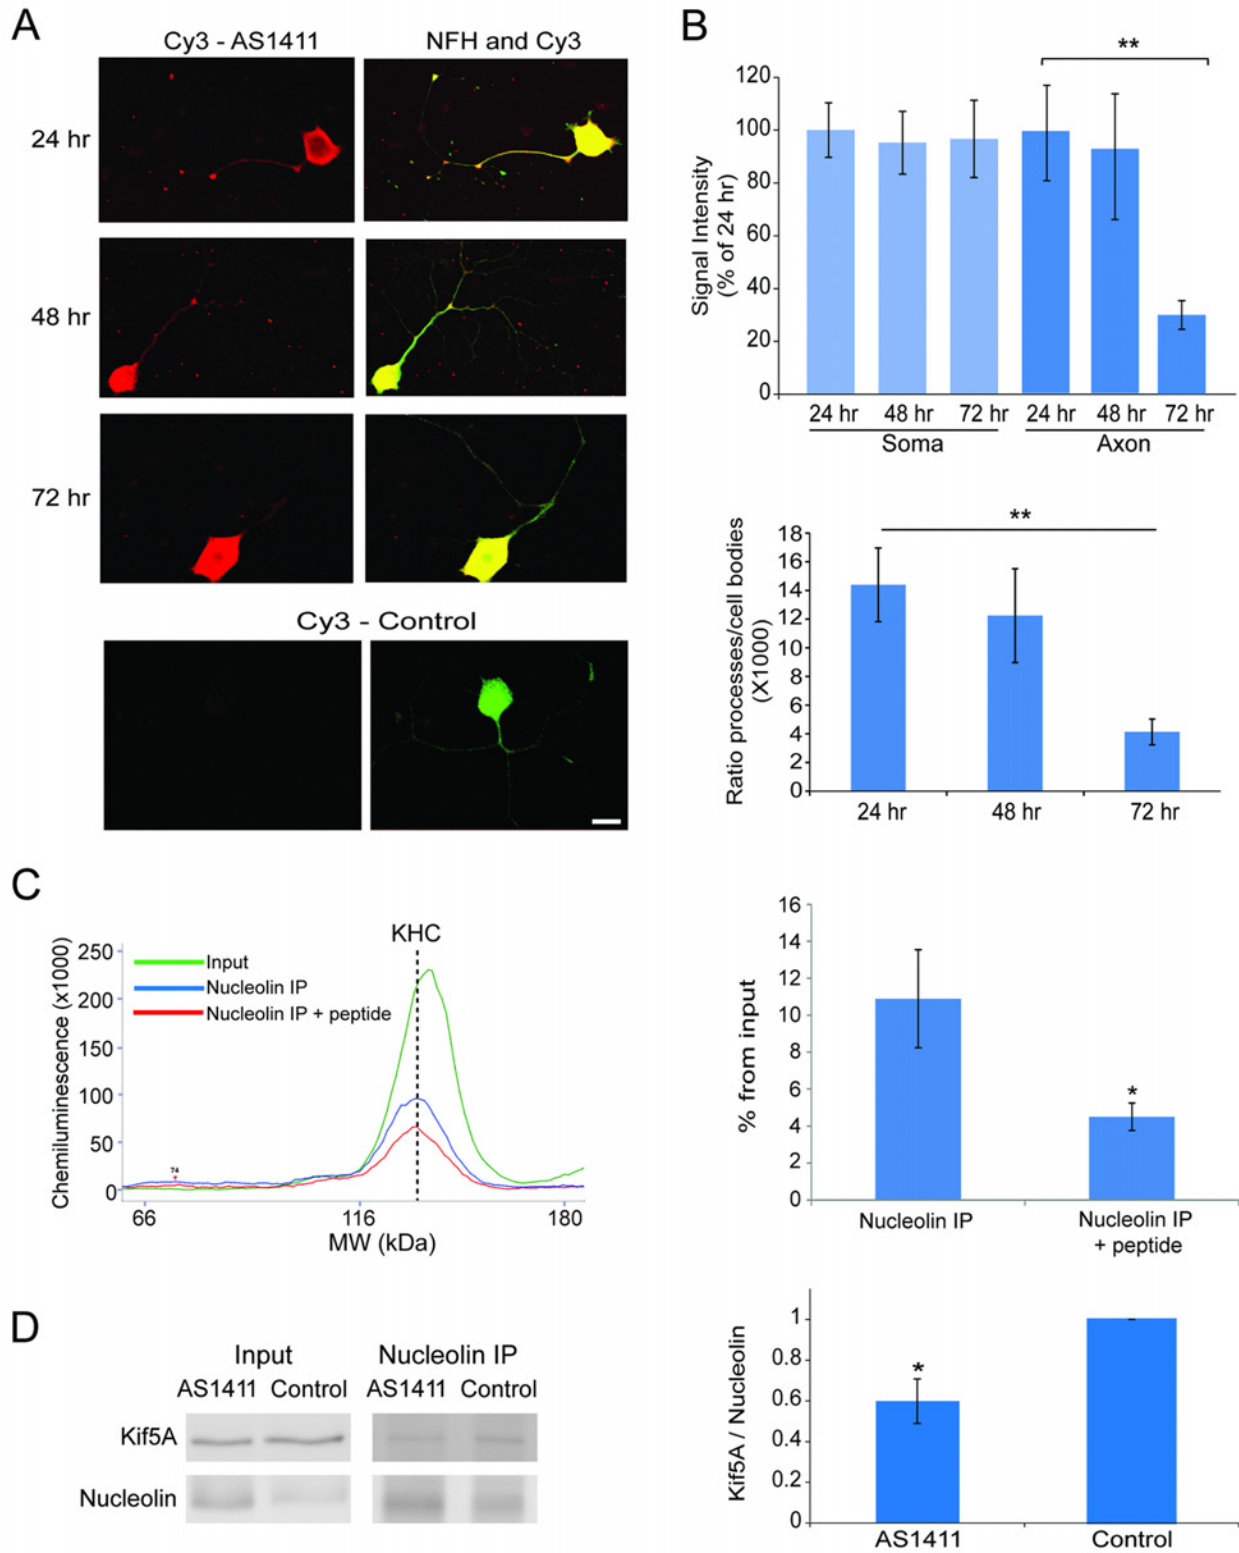

(A) Cy3 labeled AS1411 and control aptamers were added to sensory neuron cultures to a final concentration of 20  $\mu$ M. Neurons were fixed at the indicated time points and stained as indicated. Cy3 signal shown in red, NFH immunostaining in green, overlay in yellow. Scale bar 10  $\mu$ m.

(B) Quantification of soma and axon signal intensity in the experiment of Panel A 48 hr and 72 hr after AS1411 uptake. The upper graph shows quantification normalized to the signal after 24 hr, the lower graph shows the ratio of axon to cell body signal intensities. After 72 hr there is a significant decrease in cy-3 signal only in axons. Mean  $\pm$  SEM, n = 8, \*\* p < 0.005 (Student's t-test).

(C) Automated capillary electrophoresis quantifications of kinesin heavy chain (KHC) immunoreactivity co-immunoprecipitated with nucleolin from sciatic nerve axoplasm. Control immunoprecipitations were carried out in the presence of a nucleolin antibody blocking peptide. Representative traces of KHC immunoreactive peaks are shown on the left, and quantifications on the right. Mean  $\pm$  SEM, n=3, \* denotes p < 0.05 (Paired Student's t-test).

(D) Kif5A Western blots of nucleolin i.p. from DRG neurons after 48 hr in culture in the presence of AS1411 or control aptamers. The graph on the right shows quantification of co-immunoprecipitated Kif5A, mean  $\pm$  SEM, n=3 biological repeats. \*, denotes p-value < 0.05 (Paired Student's t-test).

**Figure S5** – connected to *Figure 5*

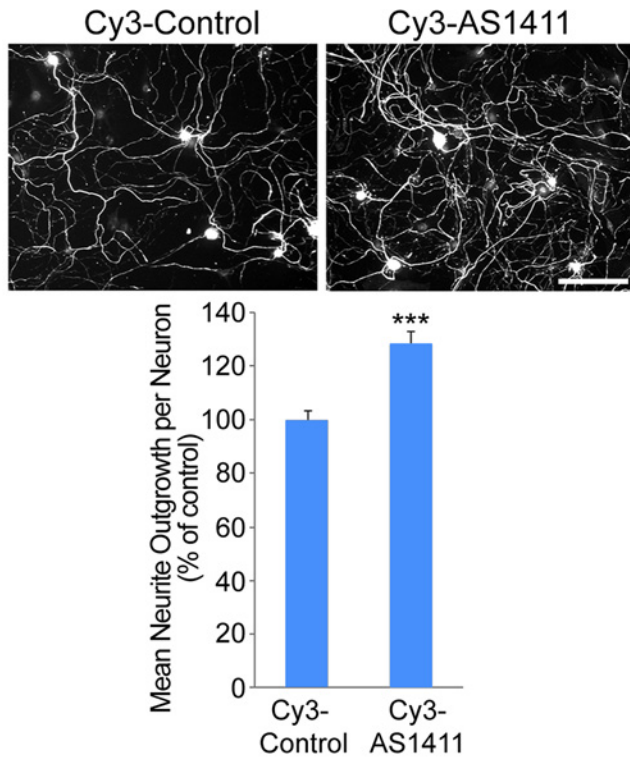

Photomicrographs of adult mouse DRG neuronal cultures immunostained for peripherin (EMD Millipore, AB1530, dilution 1:1000). Cultures were exposed to 10  $\mu$ M Cy3-Control or Cy3-AS1411 for two days to allow aptamer uptake. Neurons were then trypsinized, replated, and cultured for an additional three days for neurite outgrowth. Quantification of neurite outgrowth demonstrates significantly more neurite outgrowth per neuron for Cy3-AS1411-treated neurons compared with control. Data are mean  $\pm$  S.E.M.  $n = 96$  wells from three separate experiments. \*\*\*,  $p < 0.001$ , Student's t-test. Scale bar = 200  $\mu$ m.

**Figure S6 – connected to Figure 6**

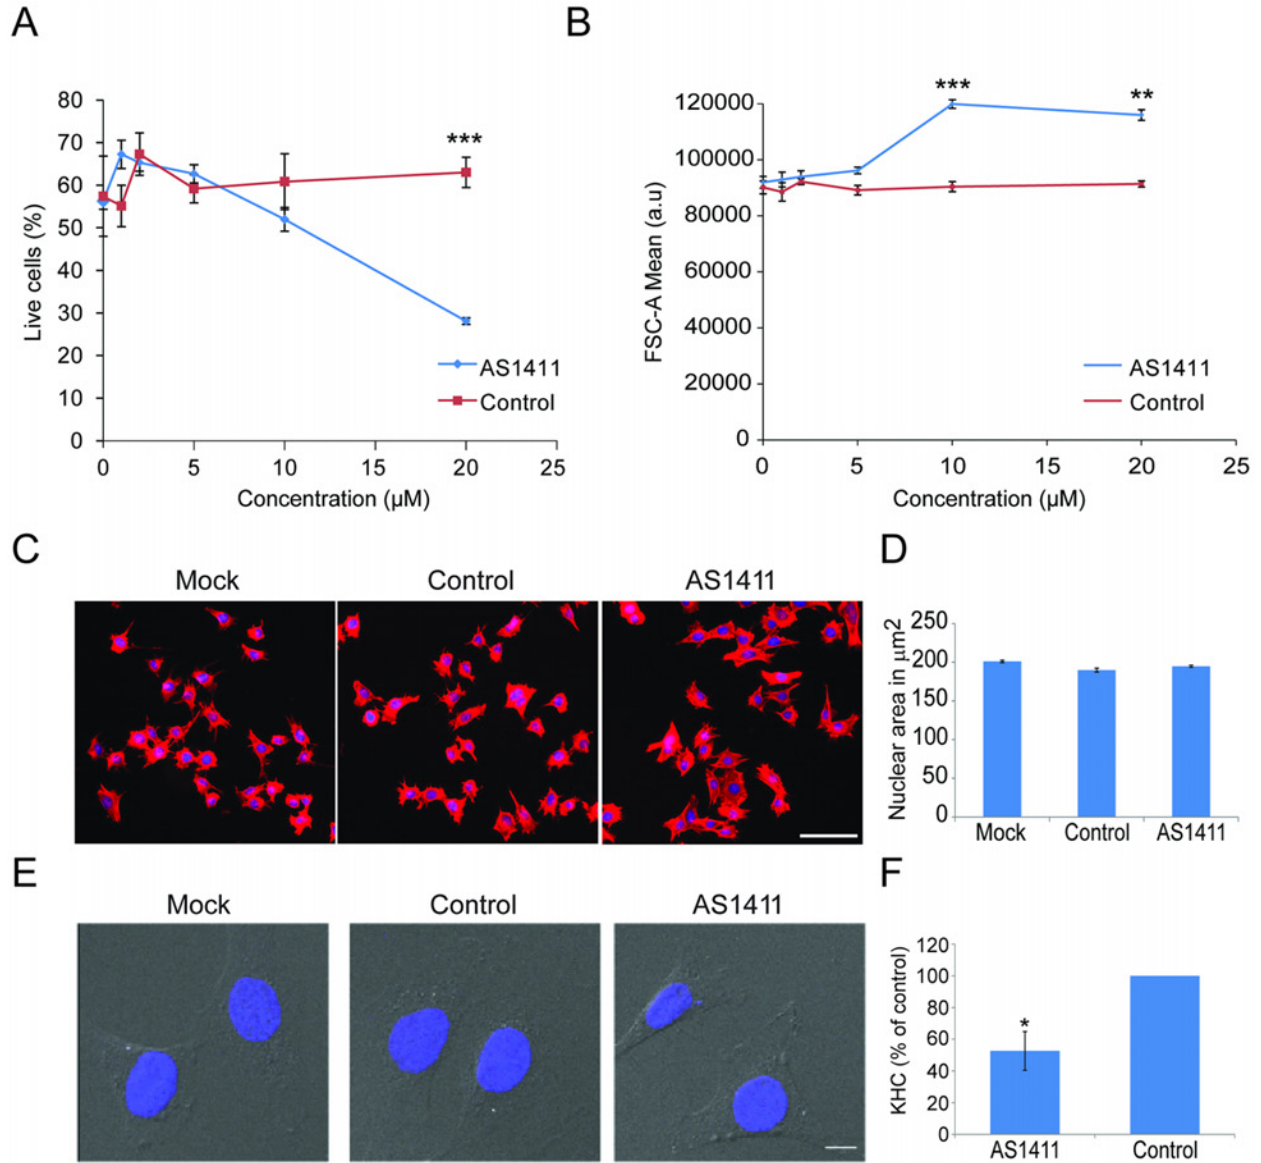

(A) 3T3 cells were incubated for 48 hours with different concentrations of AS1411 or control aptamer, and then harvested and incubated with 5 µg/ml Propidium Iodide for viability analysis by flow cytometry, collecting 30,000 events per sample. Mean ± SEM, n =3, \*\*\* denotes  $p < 0.001$  (Student's t-test).



(B) 3T3 cells were incubated as in Panel A and then underwent cell size analysis by flow cytometry, collecting 30,000 events per sample. Mean  $\pm$  SEM, n =3, \*\* denotes  $p < 0.005$ , \*\*\* denotes  $p < 0.001$  (Student's t-test).

(C) 3T3 cells were incubated with 10  $\mu$ M AS1411 or control aptamer for 48 hours, after which 20,000 cells were replated for another 24 hours in fresh medium without aptamer before fixing and staining with DAPI and rhodamine-phalloidin. Scale bar 100  $\mu$ m.

(D) Quantification of nucleus area in 3T3 cells from the experiment described in Panel C reveals that aptamer treatment has no effect on nuclear area. Mean  $\pm$  SEM, n >2000.

(E) 3T3 cells cultured and treated as described in Panel C before fixing and staining with DAPI. Representative high magnification images, scale bar 10  $\mu$ m.

(F) Quantification of kinesin heavy chain (KHC) pulled down by MAIL RNA probe from 3T3 cell lysates. Cells were incubated with AS1411 or control aptamers for 48 hr in culture before lysis and pull-down. KHC levels quantified by automated capillary electrophoresis. Data shown as % from control. Mean  $\pm$  SEM, n=5, \* denotes  $p < 0.05$  (Paired Student's t-test).

**Figure S7** – connected to *Figure 7*

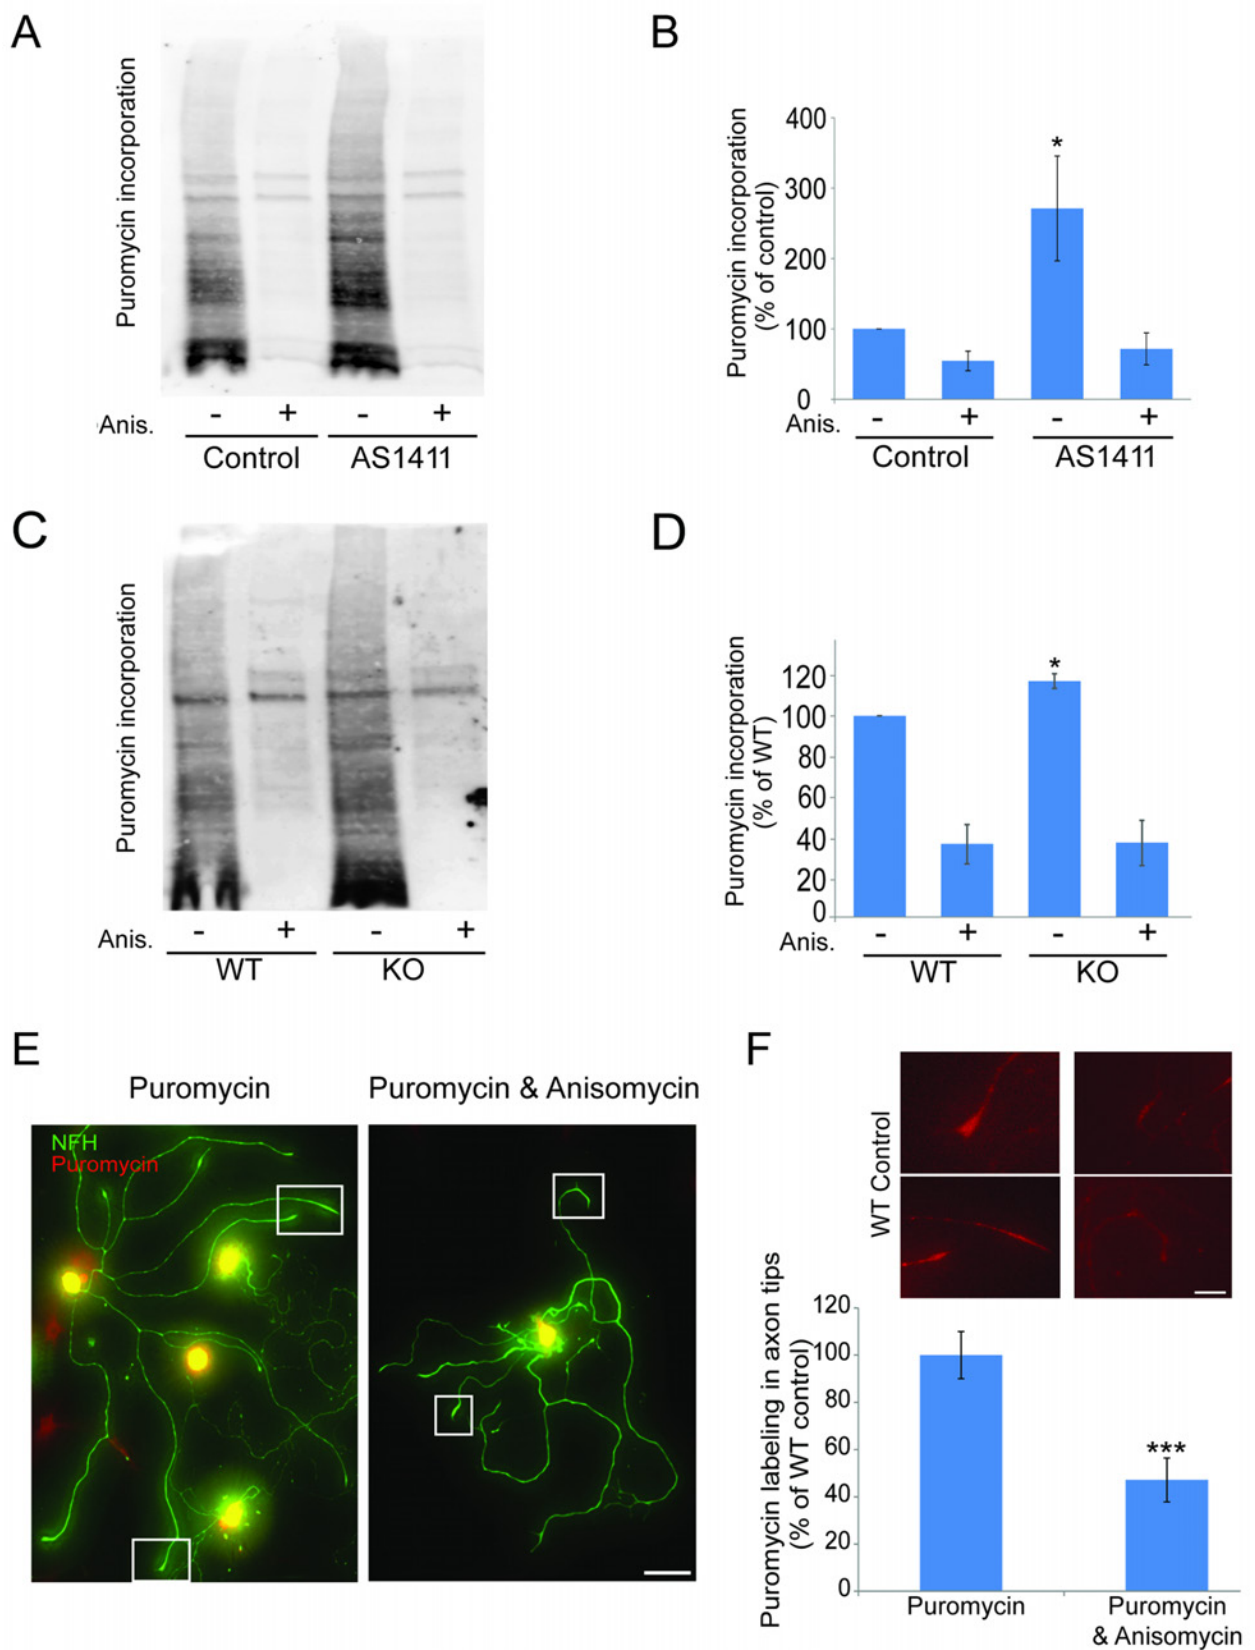

(A) The translational activity of DRG neurons in culture was assessed by puromycin incorporation. Cultures were grown in the presence of AS1411 or control aptamer for 48 hr, and then pulsed with puromycin (5  $\mu$ M) for 10 minutes, before extraction and processing for SDS-PAGE and Western blotting with a puromycin antibody. Puromycin incorporation was validated in parallel cultures preincubated with the translation inhibitor Anisomycin (40  $\mu$ M) for 30 min before puromycilation.

(B) Quantification of puromycin incorporation shows a significant increase in overall protein synthesis in AS1411-treated cultures. Mean  $\pm$  SEM, n = 4, \* denotes  $p < 0.05$  (paired Student's t-test).

(C) Puromycin incorporation in wild type versus Importin  $\beta$ 1 3'UTR knockout neurons, cultured and processed as described for Panel A.

(D) Importin  $\beta$ 1 3'UTR knockout neurons revealed significantly higher protein synthesis levels than wild type neurons. Mean  $\pm$  SEM, n = 3, \* denotes  $p < 0.05$  (paired Student's t-test).

(E) Representative images of cultured wild type sensory neurons treated with 10  $\mu$ M control aptamer for 48 hours, and then replated and cultured for an additional 24 hours in fresh medium without aptamer. Neurons were then pulsed with 5 mM puromycin for 10 min at 37°C or preincubated with 40 mM anisomycin for 30 min followed by the 5 mM puromycin pulse, and then fixed. Fixed cultures were immunostained for NFH (green) and  $\alpha$ -puromycin (red). Scale bar 100  $\mu$ m.

(F) Anisomycin treatment significantly reduced puromycin labeling in axon tips. Scale bar 20  $\mu$ m. Axon tip synthesis quantified as ratios of cell body values and then normalized to wild type control. Average  $\pm$  SEM, n  $\geq$  80 cells from three independent cultures, \*\*\* indicates  $p < 0.001$  (Student's t-test).
